# Supplementary material for: High-Content Quantification of Single-Cell Immune Dynamics
Source: PubMed Central journal article supplement — Cell Rep. 2016 Mar 31;15(2):411–22. doi: 10.1016/j.celrep.2016.03.033 (PMC4835544; doi:10.1016/j.celrep.2016.03.033), 2016-03-31
Supplement: mmc9.pdf [file mmc9.pdf]

# Cell Reports

## High-Content Quantification of Single-Cell Immune Dynamics

### Graphical Abstract

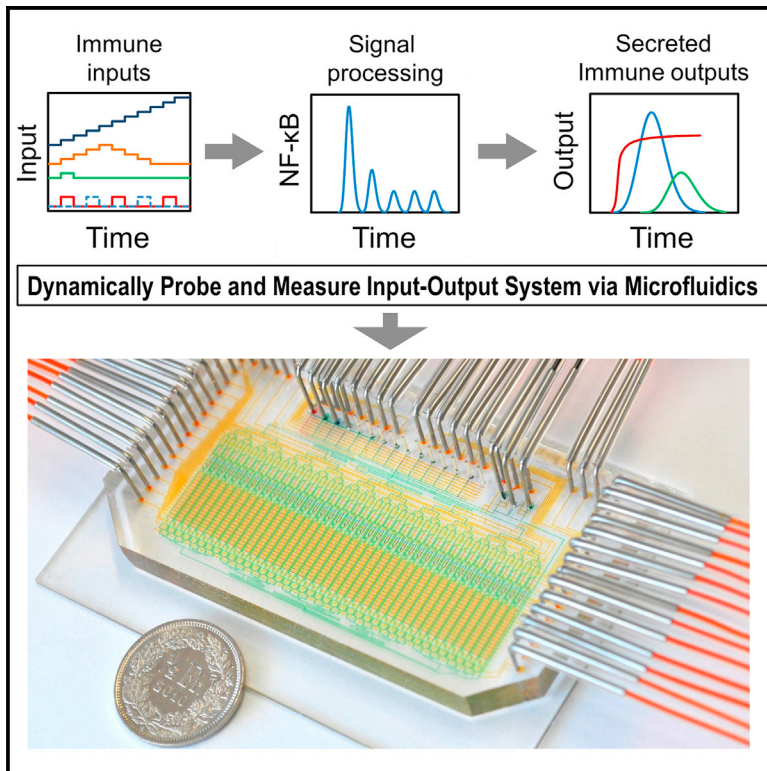

### Authors

Michael Junkin, Alicia J. Kaestli, Zhang Cheng, Christian Jordi, Cem Albayrak, Alexander Hoffmann, Savaş Tay

### Correspondence

tays@uchicago.edu

### In Brief

Junkin et al. have developed a method to quantitatively probe single-cell input-output dynamics with an automated microfluidic system. They conduct coupled measurements of transcription factor and cytokine secretion dynamics from the same single cells to enable modeling, which uncovers dynamic and noise-based roles of TRIF in the NF-κB-TNF pathway.

### Highlights

- Dynamic stimulation of single immune cells with a versatile microfluidic device
- Coupled longitudinal measurements of NF-κB localization and TNF secretion on the same cell
- Single-cell harvesting, staining, and mRNA quantification on the same device
- High-content dataset, and modeling of TRIF-based noise in TNF secretion

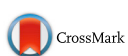

# High-Content Quantification of Single-Cell Immune Dynamics

Michael Junkin,<sup>1</sup> Alicia J. Kaestli,<sup>1</sup> Zhang Cheng,<sup>2</sup> Christian Jordi,<sup>1</sup> Cem Albayrak,<sup>1</sup> Alexander Hoffmann,<sup>2</sup> and Savaş Tay<sup>1,3,4,\*</sup>

<sup>1</sup>Department of Biosystems Science and Engineering, ETH Zürich, 4058 Basel, Switzerland

<sup>2</sup>Institute for Quantitative and Computational Biosciences and Department of Microbiology, Immunology, and Molecular Genetics, University of California, Los Angeles, Los Angeles, CA 90025, USA

<sup>3</sup>Institute for Molecular Engineering, University of Chicago, Chicago, IL 60637, USA

<sup>4</sup>Institute for Genomics and Systems Biology, University of Chicago, Chicago, IL 60637, USA

\*Correspondence: [tays@uchicago.edu](mailto:tays@uchicago.edu)

<http://dx.doi.org/10.1016/j.celrep.2016.03.033>

## SUMMARY

Cells receive time-varying signals from the environment and generate functional responses by secreting their own signaling molecules. Characterizing dynamic input-output relationships in single cells is crucial for understanding and modeling cellular systems. We developed an automated microfluidic system that delivers precisely defined dynamical inputs to individual living cells and simultaneously measures key immune parameters dynamically. Our system combines nanoliter immunoassays, microfluidic input generation, and time-lapse microscopy, enabling study of previously untestable aspects of immunity by measuring time-dependent cytokine secretion and transcription factor activity from single cells stimulated with dynamic inflammatory inputs. Employing this system to analyze macrophage signal processing under pathogen inputs, we found that the dynamics of TNF secretion are highly heterogeneous and surprisingly uncorrelated with the dynamics of NF- $\kappa$ B, the transcription factor controlling TNF production. Computational modeling of the LPS/TLR4 pathway shows that post-transcriptional regulation by TRIF is a key determinant of noisy and uncorrelated TNF secretion dynamics in single macrophages.

## INTRODUCTION

Immune cells must coordinate their activity at multiple time-scales and mount a finely tuned protective response while avoiding tissue damage. A plethora of signaling molecules, regulatory pathways, and network motifs are employed to distinguish self from foreign and calculate intensity and duration of the immune response. Cells receive time-varying inputs such as changing local concentrations of pathogen or stress-related molecules, utilize pathway dynamics to process signals (Ashall et al.,

2009; Batchelor et al., 2009; Nelson et al., 2004; Lahav et al., 2004; Tomida et al., 2012; Kellogg and Tay, 2015; Kellogg et al., 2015), and generate functional dynamic outputs by secreting their own signaling molecules. Dynamic environmental inputs can induce resonant transcriptional dynamics and synergize with intrinsic noise to amplify immune outputs (Kellogg and Tay, 2015). Characterizing such dynamic input-output relationships aids in understanding regulatory mechanisms underlying immunity, enables systems-level modeling to predict outcomes of complex physiological scenarios (Covert et al., 2005; Lipniacki et al., 2004; Lee et al., 2009; Cheong et al., 2006), and would significantly aid drug research and therapeutics (Behar et al., 2013; Cohen et al., 2008).

Understanding and modeling the immune system requires detailed multiparameter and quantitative analysis of its components. Major obstacles in this endeavor are the constantly changing nature of reactions (dynamics), broad timescales of processes from fast (milliseconds) to very slow (days), and ever-present biological noise (Tay et al., 2010; Lahav et al., 2004; Elowitz et al., 2002). Such dynamic variability makes time-dependent quantitative single-cell analysis crucial to understanding how biological systems operate. Measuring of multiple immune regulatory components is thus necessary to gain understanding of dynamic immune functions. Among these are transcription factor (TF) families such as NF- $\kappa$ B, IRFs, STATs, and SMADs that process inflammatory inputs to exercise global control on gene expression (Doupé and Perrimon, 2014; Batchelor et al., 2009; Nathan, 1987; Delgoffe et al., 2011). Live-cell fluorescent microscopy of TF dynamics has recently led to a paradigm change in the understanding of dynamic cell signaling, gene regulation (Nelson et al., 2004; Lee et al., 2009; Lahav et al., 2004; Spencer et al., 2009; Elowitz et al., 2002; Vedel et al., 2013; Lee and Covert, 2010), and contributions of noise (Kellogg and Tay, 2015) to signal processing. Signaling dynamics can influence transcriptional responses as seen with the activation dependence of the master immune regulatory NF- $\kappa$ B pathway upon input frequency (Ashall et al., 2009), or tolerate its response due to repeated pathway activation (Biswas and Lopez-Collazo, 2009). Single-cell NF- $\kappa$ B activation to an increasing cytokine input has also been found to be a digital process with a high degree of cell-to-cell variability (Tay et al., 2010). Dynamic

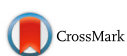

observation at the single-cell level was the enabling factor to such findings, as bulk analysis would have implied uniform and graded responses, and hence false understanding of underlying regulatory processes.

Key output parameters in resulting immune responses include cytokines, whose temporal secretion patterns exercise vital roles to guide immunity. The inflammatory phenotype of macrophages, for example, depends on prior exposure to native cytokines (Schroder et al., 2006) and can switch based upon progression of local signals (Arnold et al., 2007). A complex local milieu of cytokine inputs contributes to ongoing pathogenesis in cancer (Franklin et al., 2014; Escobar et al., 2014), inflammatory bowel disease (Zhang and Mosser, 2008), arthritis (Kinne et al., 2000), and sepsis (Bosmann and Ward, 2013). In such misregulated cases, the subtle balance of protection versus damage is lost and the immune system induces injury. Accordingly, there is much interest in characterizing the role of cytokine dynamics for design of future therapies and to develop predictive models of the immune system (Hotchkiss et al., 2013). Traditional dish-and-pipette investigation of these regulatory components using techniques such as western blotting, intracellular staining, or enzyme-linked immunospot (ELISPOT) suffer from the drawbacks of being typically single time point (static) measurements and generating semiquantitative data at best. Cells are usually lost post-assay, preventing their further genetic analysis or expansion in culture, and signaling activity can furthermore not be monitored in real time. Additional limitations remain for single-cell analysis, which has mainly consisted of static, low-throughput, and semiquantitative methods due to the technical challenges in isolating, manipulating, and measuring individual cells. Despite recent developments in cytokine secretion assays (Han et al., 2012; Fan et al., 2008), significant technical advances in dynamic input generation, cell manipulation, automation, measurement precision, and multiparameter integration are needed for complete and careful characterization of immune dynamics at the single-cell level.

To enable a multi-functional quantitative single-cell analysis platform that overcomes these limitations, we have designed a microfluidic device that stimulates single live cells dynamically and simultaneously analyzes multiple dynamic immune parameters in a non-destructive manner. High-density integration of microfluidic membrane valves, multiplexing, and computerized control allow the generation of precisely defined and highly complex biochemical inputs, controlling the type, dose, and time course of signaling input molecules delivered to single cells cultured in isolation. Using thousands of on-chip nanoliter immunoassays, this system measures the concentrations of single-cell secreted cytokines at different times, allowing absolute quantification of the rate and time course of cytokine secretion under time-varying inputs. Furthermore, the internal signaling state of the same cells is simultaneously interrogated by measurements of transcription factors via time-lapse microscopy or on-chip staining, and live cells can be retrieved from our system for further gene expression analysis or clonal expansion. These devices and associated protocols are fully automated, allowing for precisely defined long-term and complex time courses of stimulations and measurements on single cells (Gómez-Sjöberg et al., 2007; Junkin and Tay, 2014; Mehling and Tay, 2014; Bao et al., 2010; Lecault et al., 2011).

Such joint measurements of single-cell transcription factor dynamics and cytokine secretion in the same cells under complex immune inputs were not possible prior to this work. Using our system, we analyzed single-macrophage signal processing under dynamic pathogen inputs and found that TNF secretion is highly heterogeneous and surprisingly uncorrelated with the dynamics of NF- $\kappa$ B, the transcription factor controlling TNF production. Computational analysis of the LPS/TLR4 signaling pathway showed that post-transcriptional regulation by TRIF underlies the noisy and uncorrelated TNF secretion dynamics. As demonstrated with this study, the methods developed here will open up experimentation of heretofore intractable cellular dynamics of cellular systems at the single-cell level and thus lead to increased understanding and modeling of dynamic immune input-output relationships.

## RESULTS

### Microfluidic Device for Dynamic Cytokine Measurements under Complex Inputs

A two-layer polydimethylsiloxane (PDMS) microfluidic chip (Melin and Quake, 2007; Kellogg et al., 2014) was designed (Figures 1 and S1), which cultures single cells inside 40 isolated 1.35-nl chambers under the control of an automated culture and measurement system. The device utilizes thousands of PDMS membrane valves to trap and maintain single live cells inside completely isolated chambers while providing dynamic stimulations and non-destructively measuring parameters including transcription factor activation, cytokine secretion, position, and morphology. The microfluidic device is mounted on an automated stage of an inverted epifluorescence microscope placed inside an enclosure, which controls temperature, humidity, and gas composition for mammalian cell culture (Figure 1B).

### Capture and Culture of Isolated Single Cells

Cells in suspension are introduced into the chip through inlets and directed to cell capture chambers using a binary multiplexer controlled by membrane valves. PDMS traps for both suspension and adherent cells were developed to select single cells that had a high efficiency and were compact enough to fit inside a small nanoliter-sized chamber (Figure 1A; Movie S1). The design for adherent cells is based on a narrow (4  $\mu$ m) slit upon which cells impinge when driven by fluid flow. The trap has sloping sides to deflect additional cells, ensuring only single cells remain trapped. By selecting for appropriate loading densities (typically  $10^5$  cells  $\text{ml}^{-1}$ ), isolation efficiencies of 80%–100% single cells per chamber are achieved. The trap is placed in the center of an isolated culture chamber that was previously coated with fibronectin, which induces the trapped cell to adhere. Post-attachment cells can be washed, fed, and stimulated at later times without cell loss (Figure S2). The design for non-adherent cells consists of a weir type trap with slits that blocks particles without a bypass (Figure S2). This allows suspended cells to be likewise washed (Movie S7), stimulated, and have medium harvested for subsequent assays while retaining cells (Figure S3). This type of trap is also amenable for isolation of rare cell samples as it can capture low numbers of cells without allowing cell loss by trap bypass. Importantly, the individual cell

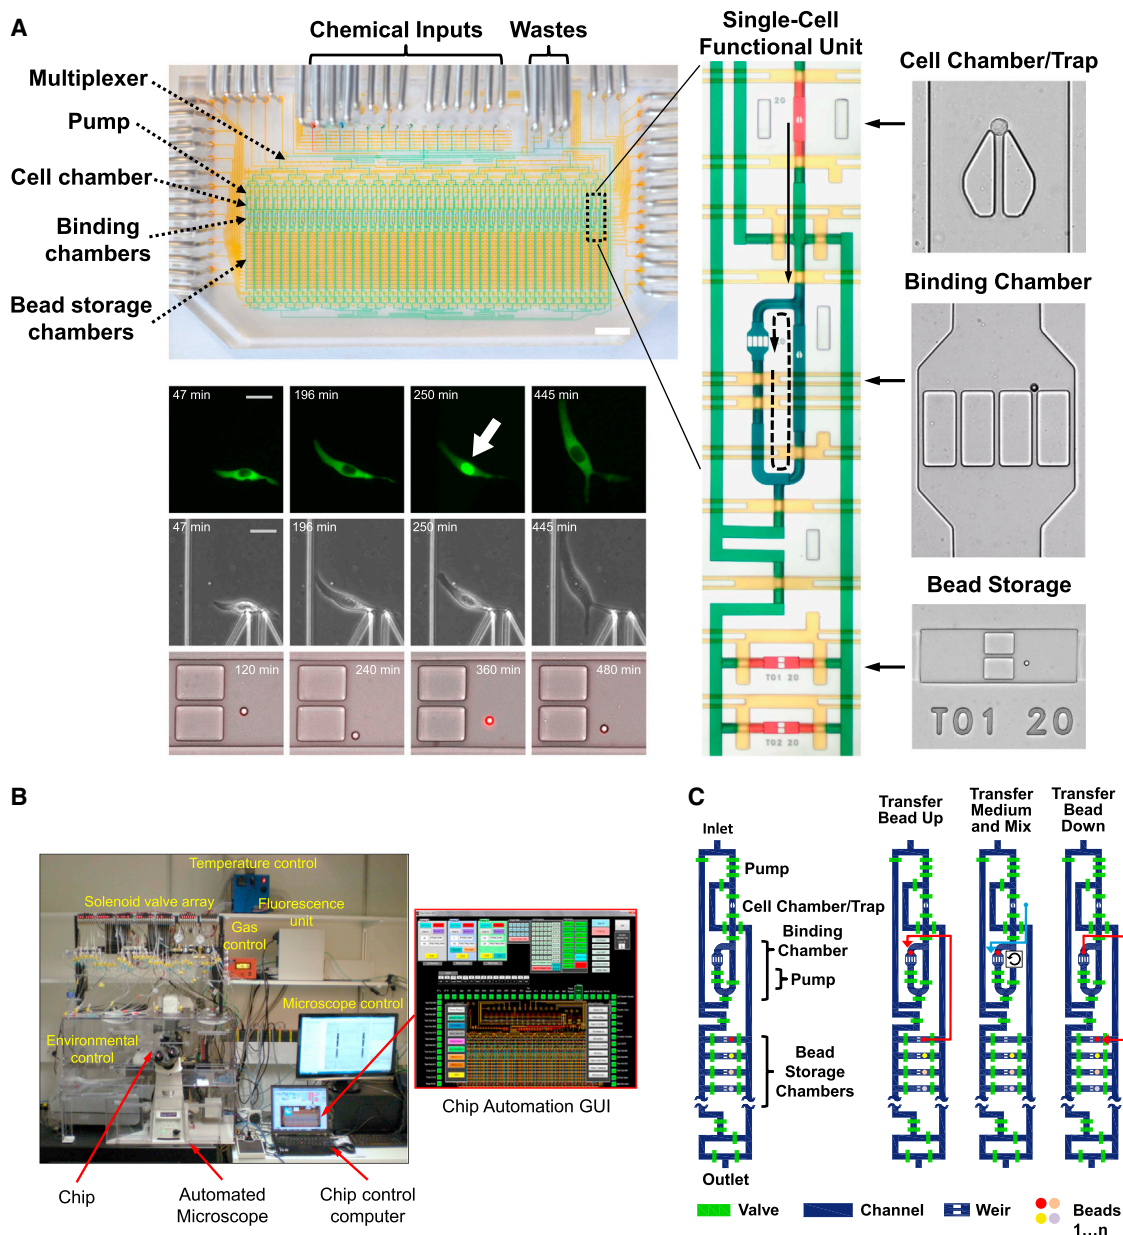

**Figure 1. Automated Microfluidic System for Multiparameter Analysis of Single-Cell Immune Dynamics**

(A) Top left: microfluidic device with functional areas indicated. The scale bar represents 5 mm. Middle right: close-up of a single functional column. The arrows show medium movement during sampling (solid) and circulation for mixing during binding (dashed). Right: close-ups showing a cell captured inside a culture chamber (red), a binding chamber (blue) with a retained bead, and beads inside storage chambers (red). Bottom left: fluorescent imaging of NF- $\kappa$ B activation (top row). The arrow shows the activated cell (RelA in nucleus), and the scale bar represents 20  $\mu$ m. Middle row: brightfield-fluorescence merged images of beads. The red spot in the third panel indicates fluorescent sandwich immune assay detection of secreted protein. (B) Setup of microfluidic device mounted on automated microscope inside atmospheric enclosure and image of control software interface. (C) Operation of secretion assay. Beads are initially loaded into storage chambers and then moved by direction of control software to binding chamber. There they are exposed to medium coming from cells through peristaltic pumping. Once analyte is mixed and bound, beads are rinsed and moved back to original storage chambers. This process is repeated with a new bead for different time points so that each row corresponds to a specific time point. See also [Figure S1](#).

chambers are entirely isolated from one another, preventing contamination from neighboring cells (Figure 1). Long-term culture of single cells isolated inside the device required stricter control of several system parameters, compared to non-single-

cell microfluidic culture. Principle among these is maintenance of a sufficiently high humidity level to which isolated single cells were observed to be more sensitive (Figure S4). Additionally, extensive rinsing of the anti-adhesive (Pluronic F-127, Invitrogen)

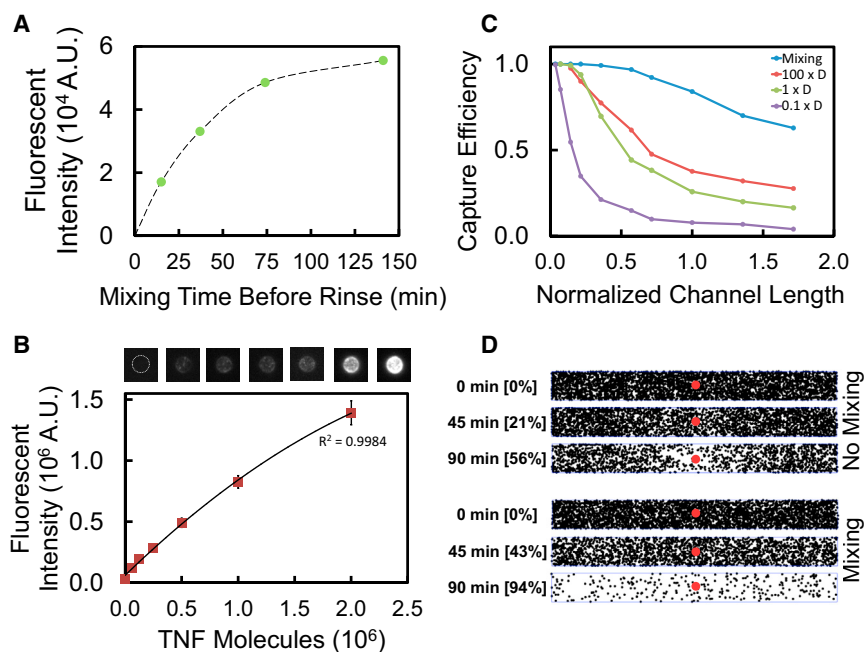

**Figure 2. On-Chip Bead Assay for Cytokine Secretion Measurement**

(A) Determination of needed mixing time. The capture of TNF on the bead surface with mixing inside a binding chamber is depicted. TNF was incubated with beads while undergoing mixing for different times before rinsing and completion of sandwich assay. Steady state is reached only after 2 hr of mixing.

(B) On-chip calibration curve of TNF capture with bead-based sandwich assay. The detection limit was taken as three times the SD of negative control measurements (LOD  $\sim$ 60,000 TNF molecules). Error bars are the standard error of the means.

(C) Modeling the effect of mixing on assay performance. Random walk model simulated proportion of cytokines bound to bead surface after 1.5 hr inside a 2D channel. Curves show the effect of varying the diffusion coefficient, D, for TNF and for mixing.

(D) Images from model depicting the benefit of mixing inside a  $1000 \times 100 \mu\text{m}$  chamber. Top images show a chamber where only diffusion is present. The area adjacent to the bead becomes depleted of cytokines (black dots) as they bind to the bead (red dot) over 1.5 hr, resulting in low capture efficiency. The lower images depict the

channel when mixing is present. The rapid mixing achieved when medium is circularly pumped inside the binding chamber enables faster binding. Numbers in brackets indicate percentages of cytokine bound to bead.

See also the [Supplemental Experimental Procedures](#) (“Random walk model for protein diffusion and capture”).

used to prevent undesired adhesion of assay components away from cell chambers was necessary. Once seeded, the cells were sealed in the PDMS chamber by membrane valves and were then intermittently fed by pumping fresh culture medium inside the chamber. These improved protocols and careful control of the environment allowed reliable culture of single isolated mammalian cells in the 1.35-nl PDMS chambers for up to several days without loss of cell viability (Figure S4).

### Automated Generation of Dynamic and Complex Signaling Inputs

By use of 16 reagent inlets controlled by automated membrane valves, coupled with the on-chip peristaltic pump and binary multiplexer, combinations of the inputs can be injected into any cell chamber at a desired time. This allows stimulation of cells with precise doses of combinatorial and time-varying signal input profiles. Temporally, input signals to cells can be switched within  $\sim$ 5 s (Movie S2), allowing rapidly increasing or decreasing concentrations of signaling molecules to be generated, as well as transient (single-pulse) signals or pulse trains. Furthermore, the delivery of multiple signals with precise control allows intricate signal histories comprised of pro- and anti-inflammatory inputs and pathogenic molecules normally present during an immune reaction to be explored (Figure S5). This input generation capability enables creation of physiologically relevant dynamic signaling environments with a wide array of possible parameters.

### Single-Cell Cytokine Secretion Measurements under Complex Inputs

Measurement of single-cell secreted molecules is achieved by conducting on-chip bead-based fluorescent sandwich immuno-

assays upon the medium surrounding a cell. Prior to experiments, antibody functionalized beads are loaded into a series of storage chambers located in the lower half of the chip (Figure 1). Beads are retained during loading by  $4\text{-}\mu\text{m}$  PDMS slits (Movie S3). When needed, they are moved via an on-chip peristaltic pump into a binding chamber (Figure 1C; Figure S1; Movie S3). During a measurement, the medium surrounding a cell is pumped into the binding chamber (Movie S4). The medium and beads are then sealed in the chamber to prevent loss of secreted molecules and are mixed by circular pumping that moves the secreted molecules over bead surfaces for efficient capture (Movies S5 and S6). After sufficient mixing for binding (Figure 2A), the chamber and beads are then rinsed and the beads are moved back to their holding areas. On-chip rinsing was critical in obtaining reproducible cytokine concentration measurements as it removes possible interfering molecules and excess antibodies between assay steps. Once all time point measurements have been conducted, detection antibodies for the sandwich assay are provided (Figure S1). When the entire assay is complete, beads are imaged and their fluorescent intensity is correlated to a calibration curve to calculate the number of cytokines released by a cell (Figure 2B). Calibrations are conducted on the chip, under identical conditions of temperature, humidity, and surface functionalization to account for factors such as affinity and cytokine diffusion present during measurements. Additionally, when multiple cytokine-specific beads are used together in a given chamber, multiplexed detection of cytokines from a single cell is possible (Figure 3A). This automated system allowed a 2-hr resolution for quantifying the concentration of single-cell secreted cytokines after stimulation with time-varying inflammatory molecules. The chip can additionally

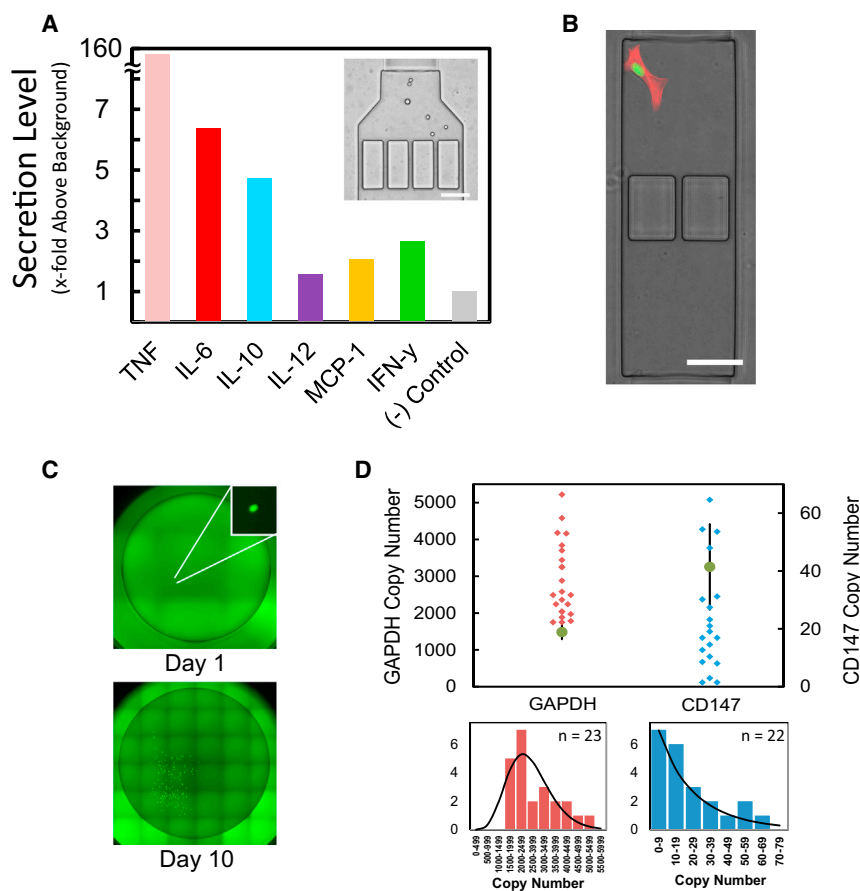

**Figure 3. Multiplexed Endpoint Measurements of Single Cells**

(A) Multiplexed detection of cytokine release. Measuring 2 hr of secretion of the indicated cytokines in response to continuous exposure to 500 ng ml<sup>-1</sup> LPS is shown. The inset shows the multiple bead types loaded into the binding chamber. The scale bar represents 50  $\mu$ m.

(B) On-chip staining. Single 3T3 cells were isolated inside chambers, cultured, then fixed and stained on the chip for actin (red). Cells additionally possessed a nuclear marker (H2B-GFP). The scale bar represents 50  $\mu$ m.

(C) Single-cell harvesting from chip and clonal expansion. Images show initial single-cell harvesting into a 96-well plate on (day 1) and subsequent expansion (day 10) of a 3T3 fibroblast previously isolated and cultured inside the microfluidic device.

(D) Single-cell gene expression for cells isolated, cultured on, and harvested from the microfluidic device. The data are the absolute copy number of *Gapdh* for KL-25 hybridoma cells (left) and *CD147* for Jurkat cells (right), measured with digital PCR. Bulk measurements are shown as round dots. Error bars are the SD of bulk measurements. Lower figures show binned data and fits to gamma distributions.

See also [Supplemental Information](#).

be reloaded with new beads after initial measurements to extend the measurement period if necessary.

Development of this specific assay method took into account the diffusion time, binding, and geometric properties of the bead-channel-antibody system. When medium is sampled, it travels from the cell chamber into a larger chamber so that no fluid is lost during transfer. A random walk model of cytokine mass transport and capture was developed to characterize this configuration and to maximize both the throughput and ability to capture soluble molecules onto beads ([Supplemental Information](#)). The simulation emphasized the necessity of active mixing, which greatly reduces the time needed to bind the cytokines present inside the mixing chamber and reach steady state ([Figures 2C and 2D](#)). The presence of active mixing allowed for increased capture and reduced incubation time ([Movie S5](#)).

### Endpoint Measurements of Single Cells: On-Chip Immunostaining, Harvesting for Clonal Expansion, and Gene Expression

Endpoint measurements can be also undertaken with the device to complement the non-destructive dynamic analysis and further increase available measurement space. Single cells may be stained on the chip for key proteins in an automated manner ([Figure 3B](#)) or be harvested via flowing out of the chip. Single-cell harvesting either allows for expansion of these cells ([Figure 3C](#)),

transcription factor activation and protein secretion with diverse endpoint analyses in conjunction with a known, well-defined signaling environment. This facilitates understanding immune input-output relationships in true multiple parameter and interconnected contexts.

### Automated Live Cell Culture and Microscopy

The system monitors single cells by periodic observation of multiple readouts of immune reactions (imaging resolution  $\sim$ 6 min). Brightfield or phase mode imaging monitors migration, cell size, and morphology and is simultaneously coupled with imaging in multiple fluorescent channels. Fluorescent detection entails imaging fusion proteins introduced into the cells that, for current experiments, reported on activation of the master immune transcription factor NF- $\kappa$ B as well as a nuclear tag ([Wall et al., 2009](#)). Imaging and positioning are under control of microscope software (Nikon), while fluidic control of the microfluidic system is directed by way of custom GUI-based MATLAB code ([Gómez-Sjöberg et al., 2007](#); [Kellogg et al., 2014](#)) ([Figure 1B](#)). This software guides all chip-level functions involved in single-cell stimulation and cytokine measurements by opening and closing PDMS membrane valves to supply components to cell and measurement chambers ([Unger et al., 2000](#)). Fully programmable control of fluidic flow enables multiday administration of well-defined, complex

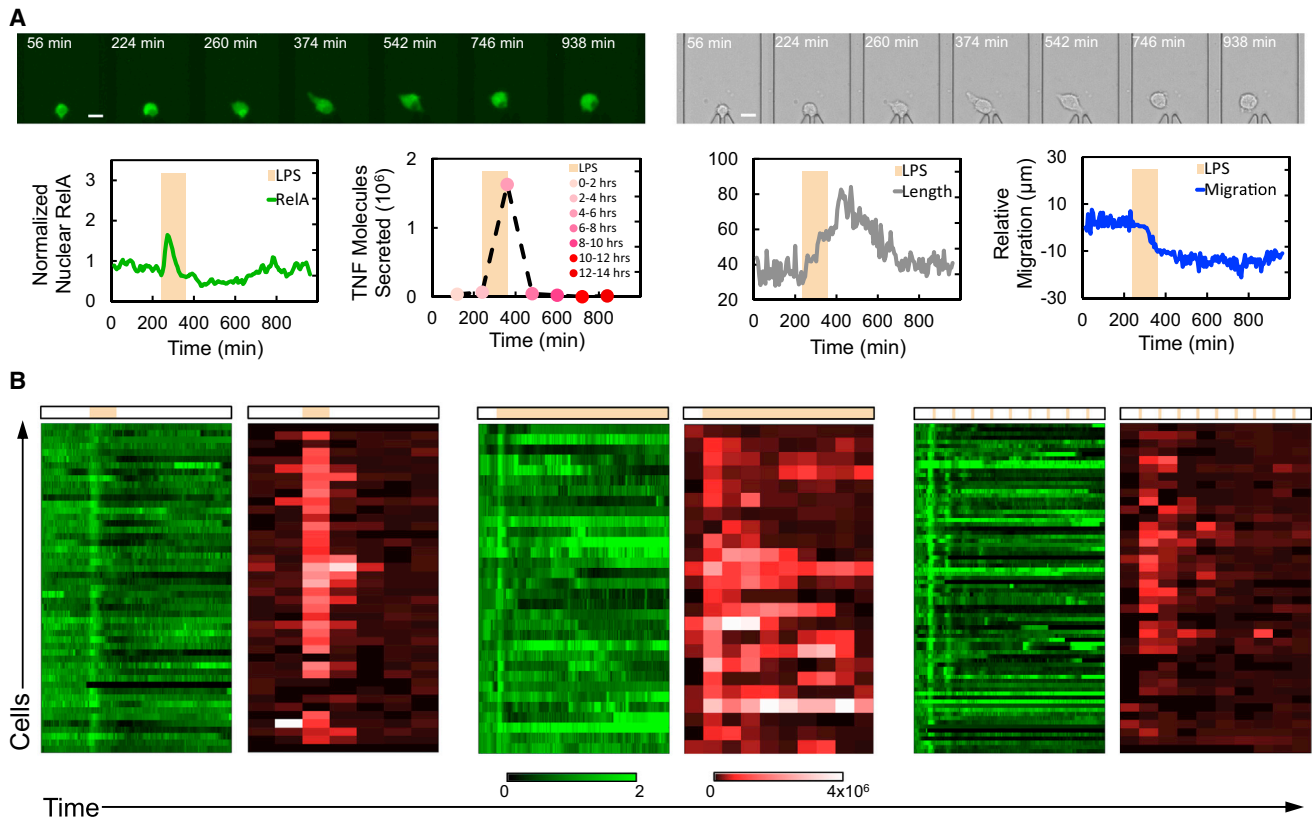

**Figure 4. High-Content Profiling of Single-Cell Responses to Dynamic Immune Inputs**

(A) Top: fluorescence and brightfield image series of a single cell over the course of LPS stimulation experiment. The scale bar represents  $20 \mu\text{m}$ . Bottom: corresponding data from this cell for NF- $\kappa\text{B}$  (RelA) activity, TNF secretion, morphology, and migration responses are shown. LPS stimulation depicted by the tan bar was  $500 \text{ ng ml}^{-1}$  for 2 hr.

(B) RelA translocation and TNF secretion for distinct LPS input dynamics. The single 2-hr pulse of LPS (left), continuous LPS exposure (center), and 8-min pulses of LPS every 2 hr (right) are shown. The bars above heatmaps depict stimulation profiles, and scale bars depict normalized nuclear RelA and molecules of TNF. Continuous stimulation leads to significantly increased cell-to-cell variability and oscillatory dynamics in TNF secretion compared to transient or pulsed stimulation. RelA is normalized to initial nuclear fluorescence intensity of each cell prior to stimulation.

temporal inputs, such as short pulses, pulse trains, sinusoidal inputs, monotonically increasing or decreasing concentrations, or alternating signaling molecules with a pre-determined sequence creating a broad input space, and significantly reduces manual labor and the possibility of human error. The diverse input space together with the dynamic and non-destructive measurements when guided by automation provide a capable system with functional properties relevant to explore single-cell immune dynamics under complex signaling inputs (Figure S6).

#### Quantification of Single Macrophages under Dynamic Inputs Reveals Highly Variable TNF Secretion Dynamics

Quantification of the macrophage input-output system was undertaken by supplying cells with a series of dynamic immune stimulatory scenarios. Beads custom functionalized to capture TNF molecules were loaded into the chip, and single mouse macrophages (RAW 264.7) were then seeded into the 40 cell chambers as described. Prior to stimulation, baseline measurements of TNF secretion were conducted by supplying medium

without any stimulant to provide insight to the cell state before stimulus. Cells were then stimulated with various dynamic inputs, and every 2 hr the surrounding medium was transferred to binding chambers and mixed with beads for the first part of the sandwich assay. Cells were not serum starved before or during stimulations. The dynamical single-cell data gathered are shown in Figure 4A, including recording of single-cell TNF secretion, transcription factor activity (nuclear localization of NF- $\kappa\text{B}$ ), morphology, and cell migration.

The temporal interactions of signal dynamics with macrophage cellular process dynamics were explored by supplying a range of signal exposures while single-cell transcription factor activity and secretion were measured. Signals consisted of bacterial lipopolysaccharide (LPS,  $500 \text{ ng ml}^{-1}$ ) provided to RAW macrophages in exposures including a single pulse, repeated pulses (a pulse-train), and continuous exposure, over the course of 20 hr. These inputs were designed to simulate brief, repeated, and chronic exposure to bacteria, respectively. NF- $\kappa\text{B}$  (RelA) and TNF (Parameswaran and Patial, 2010) secretion data for these experiments are shown in Figure 4B.

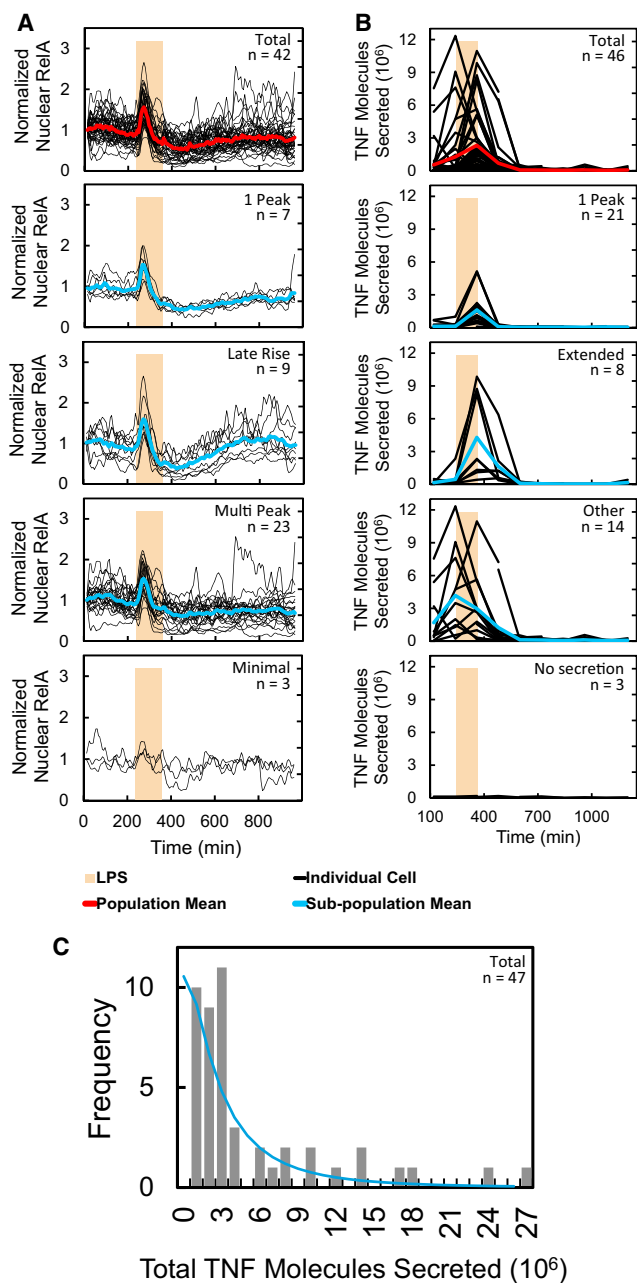

**Figure 5. Heterogeneity in Single-Cell Immune Dynamics** (A and B) NF- $\kappa$ B (RelA) (A) and TNF secretion (B) in response to 2 hr of LPS ( $500 \text{ ng ml}^{-1}$ ). The graphs depict whole population and subpopulation responses from top to bottom, respectively. (C) Total secretion over the course of the entire experiment (14 hr). The line is log-normal fit to data. Data in (B) and (C) are combined from two repeat experiments.

### Multiparameter Analysis of Single Immune Cells Reveals Poorly Correlated NF- $\kappa$ B and TNF Secretion Dynamics

Single-cell responses (NF- $\kappa$ B translocation, TNF secretion, migration, cell morphology) in all LPS exposure experiments

were heterogeneous, and certain subsets of reaction phenotypes could be identified. Figure 5A shows the NF- $\kappa$ B (RelA) response of cells exposed to a 2-hr pulse of LPS. At least four distinct sub-populations were observed in this scenario: those possessing a single NF- $\kappa$ B peak, a single peak followed by a later rise, a single peak and subsequent oscillations, and those that did not respond or only minimally responded to the LPS. TNF secretion could likewise be grouped into subsets with different temporal characteristics in response to LPS (Figure 5B). These consisted of cells that released a single, temporally limited pulse of TNF (within 2 hr), those that released TNF for an extended period (within 4 hr), those that released TNF with other types of profiles such as multi-peak secretion, and those cells that did not release TNF in response to LPS. These subsets were similarly observed when LPS was preceded by 2 hr of IL-10 ( $20 \text{ ng ml}^{-1}$ ) (Millipore, IL020) (Figure S7), and similar secretion subsets are observed with other LPS input dynamics. The amount of total TNF produced over 14 hr in response to a 2-hr LPS input is shown in Figure 5C. This followed a skewed distribution with a mean of  $4.9 \times 10^6$  TNF molecules released, but several cells secreted much higher amounts. These results are typical of the types of dynamic responses exhibited by macrophages and taken in the context of the range of temporal inputs supplied to macrophages shows the dynamic signal processing functionalities of these single cells.

The subsets of cell migration types detected showed that movement remained at a constant low level, was high independent of stimulation, or changed from a low level to a high level post-exposure to LPS (Figure S7). This was mirrored in the length and area data as well where certain portions of cells also displayed an increase in their length or area due to the LPS stimulation (Figure S7).

Examination of single-cell NF- $\kappa$ B and TNF secretion dynamics together, a measurement not possible prior to the current work, showed a lack of correlation between the relative amplitude of the two (see below), although NF- $\kappa$ B is known to be a key transcription factor responsible for TNF expression (Sung et al., 2014). This suggests the importance of other cell processes present in macrophages, which operate heterogeneously in response to LPS exposure.

### Computational Modeling of the LPS-TLR4 Pathway Reveals a Key Role for TRIF in Controlling TNF Secretion Dynamics and Variability

The observed TNF release by single cells displays a heterogeneous and dynamic immune secretory response to pathogenic input. Although NF- $\kappa$ B activation and TNF secretion were qualitatively correlated (Figure 6A), considering their amplitudes quantitatively revealed no correlation (Pearson correlation  $r = -0.06$ ; Figure 6B). To understand mechanisms of the observed TNF release profiles and understand why NF- $\kappa$ B activation and TNF secretion showed so little correlation, we undertook computational modeling of the kinetic interplay of mechanisms controlling not only TNF mRNA synthesis but also mRNA processing and half-life control, translation to TNF pro-protein, protein maturation, and secretion (Caldwell et al., 2014; Cheng et al., 2015; Werner et al., 2005).



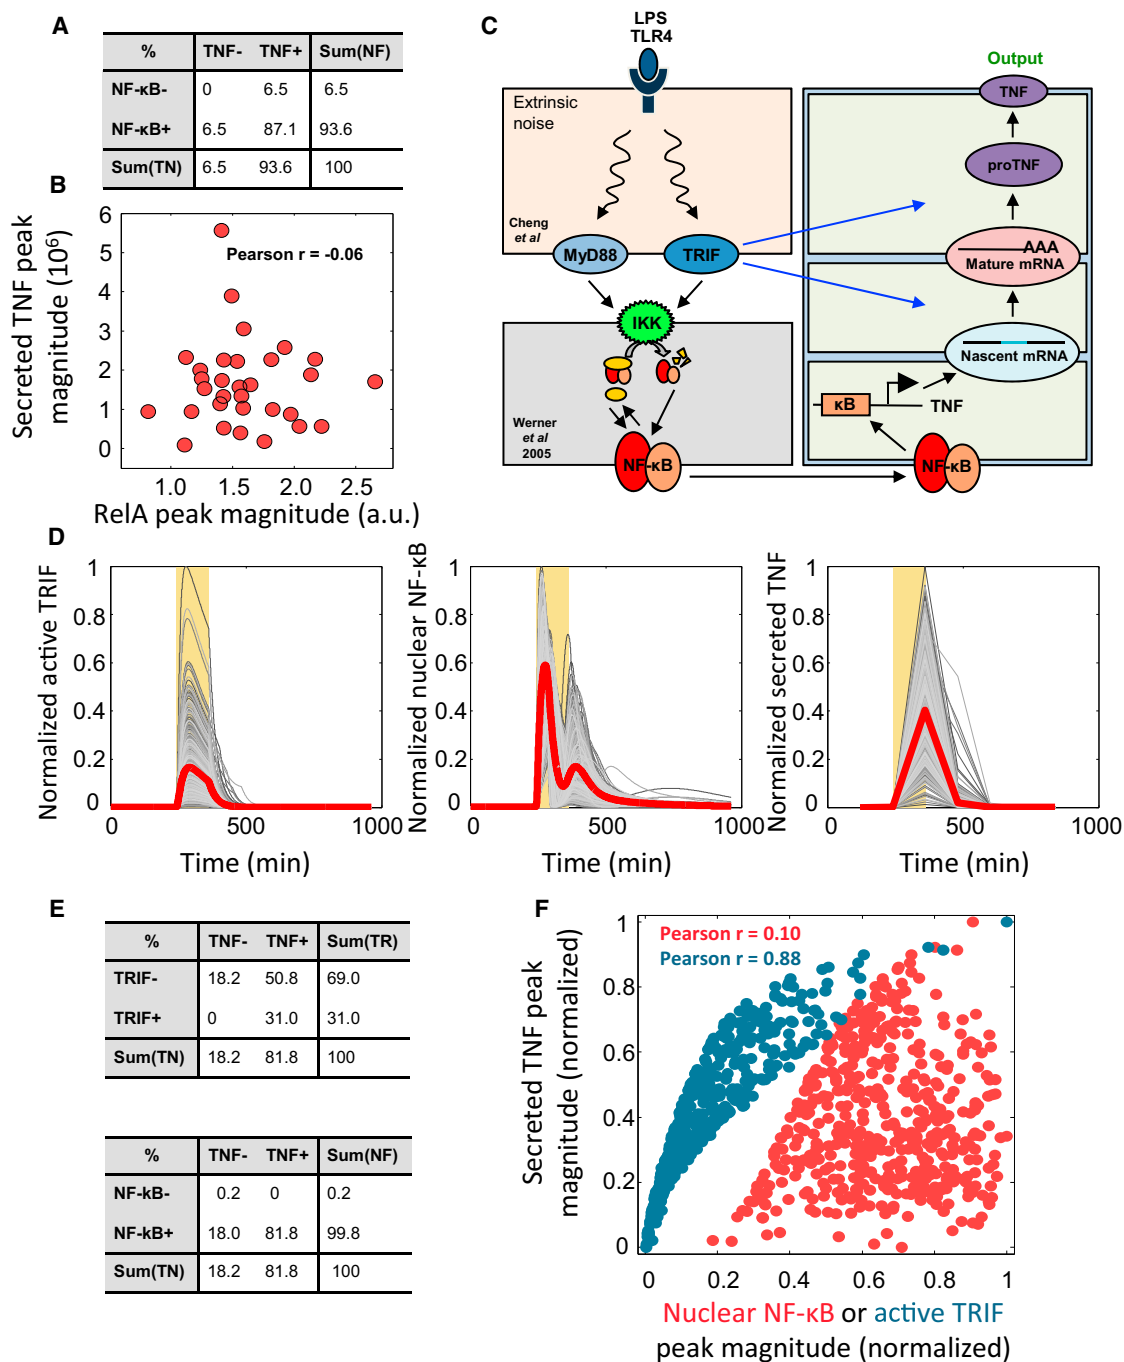

**Figure 6. Relationship between NF-κB and TNF Secretion Recapitulated by a Mathematical Model of the Mechanisms Governing NF-κB Activation and TNF Production**

(A) A table cross-correlating, qualitatively, nuclear NF-κB activation and TNF secretion. Cells with a NF-κB peak during LPS stimulation greater than baseline NF-κB level by 2 SDs are categorized as NF-κB+. Other cells are categorized as NF-κB-. Cells with a measured TNF peak larger than 5% of maximum measured TNF in the whole population are defined as TNF+; others are categorized as TNF-.

(B) Quantitative cross-correlation (by Pearson coefficient) between the magnitude of observed NF-κB peak values with observed TNF release peaks.

(C) The modified Caldwell et al. (2014) model to simulate LPS pulse induced TNF secretion at the single-cell level. Extrinsic noise was added by sampling key kinetic parameters from gamma distributions as in Cheng et al. (2015).

(D) Model predictions of active TRIF, nuclear NF-κB, and secreted TNF dynamics in 500 single cells, with red lines showing mean behavior. Simulated secretion profiles agree well with the measured single-cell TNF secretion time courses.

(legend continued on next page)

To this end we modified the established and iteratively refined mathematical model (Figure 6C) (Caldwell et al., 2014; Werner et al., 2005; Cheng et al., 2015). We modeled cell-to-cell variability by introducing extrinsic noise using distributions of key kinetic parameters as in Cheng et al. (2015) (see Supplemental Information), which then renders it capable to study dynamics of NF- $\kappa$ B and TNF secretion at a single-cell level. We focused simulations on the 2-hr pulse condition (mimicking brief pathogen exposure) and ran 500 single-cell simulations (Figure 6D) with this formulation. The result shows highly variable NF- $\kappa$ B, TRIF activity, and TNF secretion between individual cells (Figure 6D). In these simulations, we found that considering cells merely qualitatively as being either NF- $\kappa$ B or TNF positive or negative shows that NF- $\kappa$ B positivity is indeed a good predictor of TNF positivity (Figure 6E). However, evaluating the relative amplitudes quantitatively, we found that the simulations also show no correlation between NF- $\kappa$ B activity level and the amount of secreted TNF (Figure 6F), matching experimental observations. Moreover, our model suggested a strong correlation of TRIF activity with the TNF secretion (Figure 6F). TRIF was shown to play key roles in post-transcriptional regulation of TNF expression, such as mRNA half-life control, regulation of translation, pro-protein processing, and secretion, whereas Myd88 is responsible for the early phase of TNF transcription. Our work provides a mechanistic understanding of the mechanisms underlying cell-to-cell variable TNF production as well as the underlying noise sources and suggests means to both modulate noise and verify drivers of the observed TNF signaling due to dynamic inputs.

## DISCUSSION

Cells exist in dynamic environments whose complex signals result in heterogeneous, time-varying responses (Kellogg and Tay, 2015; Kellogg et al., 2015). The single-cell microfluidic analysis system we developed addresses these crucial aspects in several ways. First, the system exerts dynamic control over the signaling environment of a single cell, with an input time resolution as fast as a few seconds while also supplying these inputs over a long enough timeframe of several days, to allow the observation of the full course of the single-cell response. Key to this function is system automation, which allows otherwise complicated input and measurement profiles to be specified. This enables the creation of inputs with timescales, compositions, and durations not possible with conventional manual control that is limited by speed, reliability, and even feasibility over continuous multiday experimentation. Second, single-cell measurements were conducted dynamically with multiple readouts. This provided time-dependent data on interacting cellular subsystems whose interrelations govern immune reactions. Moreover, time course measurements were non-destructive, which preserved the signaling history of each cell. Signaling history is a major driver of heterogeneity and cell fate decisions during immunity. Main-

taining live cells also allowed for more thorough characterization by measuring baseline functions prior to initiating an immune response and detecting functions post-stimulation and to repeated stimuli. Lastly, temporal data gathering could be coupled with specific endpoint measurements in the form of staining and single-cell gene expression like digital PCR that further expand possible analysis from the integrated platform.

This system was employed to gather multiparameter data from single macrophages under dynamically modulated LPS stimulation as a means to explore input-output functioning of innate immune sensing. This provided measurements of NF- $\kappa$ B activation in fully isolated single cells where all interactions with neighboring cells were excluded, and it comprises a unique set of coupled cytokine and NF- $\kappa$ B dynamics on the same single cells. These combined dynamic measurements demonstrated several interesting observations at the single-cell level. Distinct sub-populations were observed for NF- $\kappa$ B and TNF secretion dynamics in all scenarios. These demonstrated the heterogeneity simultaneously present across multiple cell subsystems and displayed the need for single-cell observation and analysis to fully characterize and understand system regulation. A computational model fitted with our data helped interpret the observed lack of correlation between TNF secretion and its master regulator NF- $\kappa$ B and highlighted the role of the adaptor TRIF in creating uncorrelated and highly variable TNF output at the single-cell level. Interpreting such system behavior from pooled (population averaged) data would have obfuscated behavioral subsets present in the population. Taken together, these observations point to the inherent simultaneous presence of dynamically modulated heterogeneity across multiple cell pathways. The presence of heterogeneity or noise and its roles are still largely unknown in many mammalian cell systems, especially within dynamic signaling contexts. Previous efforts in this area have similarly seen dynamic signaling noise and identified an increase in transcriptional control under a dynamic input (Kellogg and Tay, 2015; Kellogg et al., 2015) as well as a modification of noise over time via soluble signaling (Patil et al., 2015). These observations highlight that the presence of noise itself in conjunction with a dynamic environment must be accounted for when attempting to understand how a system regulates its responses.

The approach described herein is broadly amenable for understanding signaling relationships including roles of noise and dynamics of a wide range of cellular systems as it is capable of measuring any number of secreted molecules and fusion proteins non-destructively from single cells without a need for system modification. It can furthermore incorporate other endpoint assays such as digital PCR or sequencing, as single cells can be harvested from our microfluidic devices. The demonstrated increase in parameter space and measurement accuracy is beneficial for providing parameters upon which to base computational models (Tay et al., 2010). Additionally relevant is that the system can measure an input parameter space that is orders of

(E) The model simulations indicate that, qualitatively, NF- $\kappa$ B positivity (NF- $\kappa$ B+) correlates better to TNF positivity (TNF+) than TRIF positivity (TRIF+). Many cells categorized as TRIF- may produce TNF above the detectable level.

(F) The model simulations indicate that TNF peak magnitude is not quantitatively correlated (by Pearson coefficient) to nuclear NF- $\kappa$ B peak magnitude but is quantitatively correlated to peak TRIF values.

magnitude larger than typical single-cell assays. The system can provide multiple stimulation components, supplied at different doses of arbitrary pulse lengths, and frequencies to create a high number of possible input variations to effectively address the little explored dynamic multiparameter components of cellular signaling and signal processing. Finally the system is amenable to use with a diverse range of cell types from adherent cell lines to non-adherent cells, giving it broad potential to study a wide variety of immune questions. The combined capabilities developed for the present system are, crucially, not present together in existing microfluidic methods for investigating signaling at the single-cell level. While temporal multiparameter outputs can be measured by well-based assays (Love et al., 2006; Fitzgerald et al., 2015), dynamic multiparameter inputs cannot be supplied to temporally investigate input space. Similarly, output measurement is limited to a single time point in other methods (Fan et al., 2008; Chokkalingam et al., 2013; Wu et al., 2012) or relies on fixation of multiple different cell populations (Blazek et al., 2015; Ng et al., 2015), thereby hindering investigating output dynamics and history on the same cells over time. Several current methods are also destructive, which further precludes the possibility of cell retrieval post assay. Many methods by their nature are not amenable to detecting internal cellular parameters with high-resolution imaging and so cannot couple the governing internal process to observed signaling outputs. Still other methods lack absolute quantification of secreted molecules, challenging interpretation and modeling (Chokkalingam et al., 2013; Raphael et al., 2013; Shirasaki et al., 2014). Thus, the current system presents a uniquely integrated platform that will provide the necessary, comprehensive, and multiplexed information to enable characterizing input-output functions to realize predictive models of biological systems within noisy and dynamic contexts. This detailed understanding will aid in exploring new areas to gain both basic insights into cell regulation mechanisms and to uncover important therapeutic potentials related to input dynamics and heterogeneity

## EXPERIMENTAL PROCEDURES

### Single-Cell Cytokine Assays

To conduct on-chip assays, microfluidic chips are first prepared by coating all internal chip surfaces except cell chambers with Pluronic F-127 (Life Technologies, P6867) dissolved in deionized water at  $2 \text{ mg ml}^{-1}$  to reduce protein adsorption and adherence of cells and beads. The chips are then extensively rinsed overnight with PBS via a control script, before cell chambers are coated with fibronectin (Millipore, FC010) dissolved at  $200 \text{ } \mu\text{g ml}^{-1}$  in PBS for at least 5 hr to promote cell attachment. Chips are then rinsed with  $\text{CO}_2$  equilibrated medium, and bead storage chambers are loaded with one bead each per individual cytokine to be assayed. Cells are then detached from T75 culture dishes with versene (Life Technologies, 15040-033), filtered through a  $20\text{-}\mu\text{m}$  filter (CellTrics, 04-004-2325) to remove clumps, and suspended at  $1 \times 10^5\text{--}3.5 \times 10^5 \text{ cells ml}^{-1}$  for introduction into the chips. Cells are individually flowed into cell chambers until visual confirmation of cell capture. Loading of all cell traps is usually achieved in less than 10 min. Once loaded with cells, the complete operation of fluidic control and imaging is automatic and does not require operator input. MATLAB control scripts are available upon request.

### Components for Cytokine Detection via Immunosandwich Assays

TNF is detected using  $10.3\text{-}\mu\text{m}$  diameter streptavidin functionalized beads obtained from Spherotech (SVP-100-4). A biotinylated antibody (United

States Biological, T9160-14) was attached to the surface of these beads in PBS adjusted to pH 5.5. TNF for calibrations was obtained from Life Technologies (PMC3014) and aliquoted in PBS containing  $1 \text{ mg ml}^{-1}$  BSA. These aliquots were dissolved in normal macrophage medium for calibrations. The detection antibody was obtained from genwaybio (GWB-489500) and was used at a concentration of  $3.19 \text{ } \mu\text{g ml}^{-1}$ . The fluorescent secondary antibody was obtained from United States Biological (I1903-12H) and was used at a concentration of  $3.3 \text{ } \mu\text{g ml}^{-1}$ . Between assay steps, beads were washed with PBS-Tween ( $0.563 \text{ mg ml}^{-1}$ ). TNF binding to beads took place over 90 min with mixing by on-chip pumps, whereas rinsing and antibody steps each took place over 30 min with mixing. Sandwich assays with commercial bead kits (BD Biosciences, 552364, 560232, and 558345) used during multiplexed cytokine detection relied on the provided PE tagged secondary antibodies and manufacturer protocols. Detailed protocols are available upon request.

### Assay Components for Cellular Stimulation

Components for cellular stimulations included LPS obtained from Sigma Aldrich (L4524), IL-6 obtained from Sigma Aldrich (I9646), IL-10 from Millipore (IL020), IL-1 $\beta$  from Life Technologies (PMC0814), IFN- $\gamma$  from Ebioscience (14-8311-63), Pam3CSK4 from Invivogen (tlrl-pms), and flagellin obtained from Invivogen (tlrl-pstfla).

### Imaging and Environmental Control

Microfluidic devices are mounted on an automated stage of an inverted microscope (Nikon Eclipse Ti) placed inside an enclosure (Life Imaging Services) that is temperature, humidity, and gas composition controlled for mammalian cell culture (Figure 1B). Temperature is maintained for the whole microscope while inlet gas flow rate,  $\text{CO}_2$  percentage, and humidity are under active control inside a small stage top incubator fitted directly over the microfluidic device. The parameters for this stage cover that were found to be optimal for culturing of single cells were a  $\text{CO}_2$  level of 5%, a flow rate of 25–30 l/hr, and a relative humidity level set to 100%. Imaging of the microfluidic chip during operation is accomplished via the supplied microscope software (NIS-Elements AR 4.20.01) that spatially moves and images the chip in multiple color channels and is completely separate from that of the fluidic and environmental control systems. Code and scripts for fluidic control are available upon request.

### Single-Cell mRNA Measurement

Single cells were harvested from microfluidic chips by automatically timing the fluidic flow directed to each chamber in series to yield  $3.95 \text{ } \mu\text{l}$  of sample. Collected volumes were either harvested via tubing or pipetted upon exit from a cut made in the chip. Harvesting buffer consisted of 5 nM  $\text{K}_2\text{HPO}_4$  (Sigma P3786) to which was added 5 nM  $\text{KH}_2\text{PO}_4$  (Sigma-Aldrich P0662) until a pH of 7.2 was reached. Samples were placed inside RNase-free Eppendorf tubes containing  $1 \text{ } \mu\text{l}$  lysis buffer before freezing on dry ice and storage at  $-80^\circ\text{C}$  until further processing. Lysis buffer consisted of (by volume) 10% TM buffer (Biochain K3011010-1), 5% RNase OUT (Life Technologies 10777-019), 2% protease inhibitor (Biochain K3011010-2), and 83% cell resuspension buffer (Life Technologies 4405377). Once thawed,  $1 \text{ } \mu\text{l}$  random primer solution was added to the tubes (Promega C118B) and they were incubated for 5 min at  $70^\circ\text{C}$ .  $4.05 \text{ } \mu\text{l}$  reverse transcriptase solution was then added and samples were thermocycled for reverse transcription (5 min  $25^\circ\text{C}$ , 60 min  $42^\circ\text{C}$ , 15 min  $70^\circ\text{C}$ , hold at  $4^\circ\text{C}$ ). All RT components were from the Promega GoScript Reverse Transcription System (A5001) kit and the RT solution consisted of (by volume) 44.4% GoScript 5X Reaction Buffer, 11.1% GoScript Reverse Transcriptase, 11.1% PCR Nucleotide Mix, 5.6% Recombinant RNasin Ribonuclease Inhibitor, and 27.8%  $\text{MgCl}_2$ . Upon completion of RT,  $10 \text{ } \mu\text{l}$  PCR master mix (Bio-Rad 2x ddPCR Supper Mix 290-10420) and  $1 \text{ } \mu\text{l}$  TaqMan probes (Life Technologies Mm99999915\_g1 for *Gapdh* and Hs00174305\_m1 for *CD147*) were added before samples were formed into droplets using Bio-Rad droplet generation oil (186-3005) and a Bio-Rad QX100 Droplet Generator. After PCR thermocycling (10 min  $95^\circ\text{C}$ , 40 cycles of 30 s  $94^\circ\text{C}$ , and 1 min  $60^\circ\text{C}$ , then 10 min  $98^\circ\text{C}$  and a final hold at  $4^\circ\text{C}$ ) droplets were read via a (QX100 Bio-Rad Droplet Reader) and analyzed with the corresponding QuantaSoft program. Bulk RNA extractions were conducted with

QIAGEN RNeasy Mini Kit (74104) per instructions from the manufacturer and processed in the same manner as single-cell samples.

### SUPPLEMENTAL INFORMATION

Supplemental Information includes Supplemental Experimental Procedures, seven figures, and seven movies and can be found with this article online at <http://dx.doi.org/10.1016/j.celrep.2016.03.033>.

### AUTHOR CONTRIBUTIONS

M.J. fabricated the devices and performed the simulations, experiments, and analysis. A.J.K. assisted with experimentation and data analysis. Z.C. and A.H. performed modeling and analysis. C.J. and C.A. assisted with mRNA analysis. S.T. supervised the study. All authors contributed to the writing of the manuscript.

### ACKNOWLEDGMENTS

The authors would like to thank Dr. Thomas Horn at the ETH Zürich Single Cell Facility for assistance with microscopy. This work is supported by an ERC Starting Grant (SingleCellDynamics), Schweizerischer Nationalfonds, and a SystemsX research grant to S.T.

Received: November 30, 2015

Revised: January 19, 2016

Accepted: March 9, 2016

Published: March 31, 2016

### REFERENCES

- Arnold, L., Henry, A., Poron, F., Baba-Amer, Y., van Rooijen, N., Plonquet, A., Gherardi, R.K., and Chazaud, B. (2007). Inflammatory monocytes recruited after skeletal muscle injury switch into antiinflammatory macrophages to support myogenesis. *J. Exp. Med.* *204*, 1057–1069.
- Ashall, L., Horton, C.A., Nelson, D.E., Paszek, P., Harper, C.V., Sillitoe, K., Ryan, S., Spiller, D.G., Unitt, J.F., Broomhead, D.S., et al. (2009). Pulsatile stimulation determines timing and specificity of NF- $\kappa$ B-dependent transcription. *Science* *324*, 242–246.
- Bao, X.R., Fraser, I.D.C., Wall, E.A., Quake, S.R., and Simon, M.I. (2010). Variability in G-protein-coupled signaling studied with microfluidic devices. *Biophys. J.* *99*, 2414–2422.
- Batchelor, E., Loewer, A., and Lahav, G. (2009). The ups and downs of p53: understanding protein dynamics in single cells. *Nat. Rev. Cancer* *9*, 371–377.
- Behar, M., Barken, D., Werner, S.L., and Hoffmann, A. (2013). The dynamics of signaling as a pharmacological target. *Cell* *155*, 448–461.
- Biswas, S.K., and Lopez-Collazo, E. (2009). Endotoxin tolerance: new mechanisms, molecules and clinical significance. *Trends Immunol.* *30*, 475–487.
- Blazek, M., Santisteban, T.S., Zengerle, R., and Meier, M. (2015). Analysis of fast protein phosphorylation kinetics in single cells on a microfluidic chip. *Lab Chip* *15*, 726–734.
- Bosmann, M., and Ward, P.A. (2013). The inflammatory response in sepsis. *Trends Immunol.* *34*, 129–136.
- Caldwell, A.B., Cheng, Z., Vargas, J.D., Birnbaum, H.A., and Hoffmann, A. (2014). Network dynamics determine the autocrine and paracrine signaling functions of TNF. *Genes Dev.* *28*, 2120–2133.
- Cheng, Z., Taylor, B., Ourthiague, D.R., and Hoffmann, A. (2015). Distinct single-cell signaling characteristics are conferred by the MyD88 and TRIF pathways during TLR4 activation. *Sci. Signal.* *8*, ra69.
- Cheong, R., Bergmann, A., Werner, S.L., Regal, J., Hoffmann, A., and Levchenko, A. (2006). Transient I $\kappa$ B kinase activity mediates temporal NF- $\kappa$ B dynamics in response to a wide range of tumor necrosis factor- $\alpha$  doses. *J. Biol. Chem.* *281*, 2945–2950.
- Chokkalingam, V., Tel, J., Wimmers, F., Liu, X., Semenov, S., Thiele, J., Figdor, C.G., and Huck, W.T.S. (2013). Probing cellular heterogeneity in cytokine-secreting immune cells using droplet-based microfluidics. *Lab Chip* *13*, 4740–4744.
- Cohen, A.A., Geva-Zatorsky, N., Eden, E., Frenkel-Morgenstern, M., Issaeva, I., Sigal, A., Milo, R., Cohen-Saidon, C., Liron, Y., Kam, Z., et al. (2008). Dynamic proteomics of individual cancer cells in response to a drug. *Science* *322*, 1511–1516.
- Covert, M.W., Leung, T.H., Gaston, J.E., and Baltimore, D. (2005). Achieving stability of lipopolysaccharide-induced NF- $\kappa$ B activation. *Science* *309*, 1854–1857.
- Delgoffe, G.M., Murray, P.J., and Vignali, D.A.A. (2011). Interpreting mixed signals: the cell's cytokine conundrum. *Curr. Opin. Immunol.* *23*, 632–638.
- Doupé, D.P., and Perrimon, N. (2014). Visualizing and manipulating temporal signaling dynamics with fluorescence-based tools. *Sci. Signal.* *7*, re1.
- Elowitz, M.B., Levine, A.J., Siggia, E.D., and Swain, P.S. (2002). Stochastic gene expression in a single cell. *Science* *297*, 1183–1186.
- Escobar, G., Moi, D., Ranghetti, A., Ozkal-Baydin, P., Squadrito, M.L., Kajaste-Rudnitski, A., Bondanza, A., Gentner, B., De Palma, M., Mazziere, R., and Naldini, L. (2014). Genetic engineering of hematopoiesis for targeted IFN- $\alpha$  delivery inhibits breast cancer progression. *Sci. Transl. Med.* *6*, 217ra3.
- Fan, R., Vermesh, O., Srivastava, A., Yen, B.K.H., Qin, L., Ahmad, H., Kwong, G.A., Liu, C.-C., Gould, J., Hood, L., and Heath, J.R. (2008). Integrated barcode chips for rapid, multiplexed analysis of proteins in microliter quantities of blood. *Nat. Biotechnol.* *26*, 1373–1378.
- Fitzgerald, V., Manning, B., O'Donnell, B., O'Reilly, B., O'Sullivan, D., O'Kennedy, R., and Leonard, P. (2015). Exploiting highly ordered subnanoliter volume microcapillaries as microtools for the analysis of antibody producing cells. *Anal. Chem.* *87*, 997–1003.
- Franklin, R.A., Liao, W., Sarkar, A., Kim, M.V., Bivona, M.R., Liu, K., Pamer, E.G., and Li, M.O. (2014). The cellular and molecular origin of tumor-associated macrophages. *Science* *344*, 921–925.
- Gómez-Sjöberg, R., Leyrat, A.A., Pirone, D.M., Chen, C.S., and Quake, S.R. (2007). Versatile, fully automated, microfluidic cell culture system. *Anal. Chem.* *79*, 8557–8563.
- Han, Q., Bagheri, N., Bradshaw, E.M., Hafler, D.A., Lauffenburger, D.A., and Love, J.C. (2012). Polyfunctional responses by human T cells result from sequential release of cytokines. *Proc. Natl. Acad. Sci. USA* *109*, 1607–1612.
- Hotchkiss, R.S., Monneret, G., and Payen, D. (2013). Sepsis-induced immunosuppression: from cellular dysfunctions to immunotherapy. *Nat. Rev. Immunol.* *13*, 862–874.
- Junkin, M., and Tay, S. (2014). Microfluidic single-cell analysis for systems immunology. *Lab Chip* *14*, 1246–1260.
- Kellogg, R.A., and Tay, S. (2015). Noise facilitates transcriptional control under dynamic inputs. *Cell* *160*, 381–392.
- Kellogg, R.A., Gómez-Sjöberg, R., Leyrat, A.A., and Tay, S. (2014). High-throughput microfluidic single-cell analysis pipeline for studies of signaling dynamics. *Nat. Protoc.* *9*, 1713–1726.
- Kellogg, R.A., Tian, C., Lipniacki, T., Quake, S.R., and Tay, S. (2015). Digital signaling decouples activation probability and population heterogeneity. *eLife* *4*, e08931.
- Kinne, R.W., Bräuer, R., Stuhlmüller, B., Palombo-Kinne, E., and Burmester, G.-R. (2000). Macrophages in rheumatoid arthritis. *Arthritis Res.* *2*, 189–202.
- Lahav, G., Rosenfeld, N., Sigal, A., Geva-Zatorsky, N., Levine, A.J., Elowitz, M.B., and Alon, U. (2004). Dynamics of the p53-Mdm2 feedback loop in individual cells. *Nat. Genet.* *36*, 147–150.
- Lecault, V., Vaninsberghe, M., Sekulovic, S., Knapp, D.J.H.F., Wohrer, S., Bowden, W., Viel, F., McLaughlin, T., Jarandehi, A., Miller, M., et al. (2011).

- High-throughput analysis of single hematopoietic stem cell proliferation in microfluidic cell culture arrays. *Nat. Methods* 8, 581–586.
- Lee, T.K., and Covert, M.W. (2010). High-throughput, single-cell NF- $\kappa$ B dynamics. *Curr. Opin. Genet. Dev.* 20, 677–683.
- Lee, T.K., Denny, E.M., Sanghvi, J.C., Gaston, J.E., Maynard, N.D., Hughey, J.J., and Covert, M.W. (2009). A noisy paracrine signal determines the cellular NF- $\kappa$ B response to lipopolysaccharide. *Sci. Signal.* 2, ra65.
- Lipniacki, T., Paszek, P., Brasier, A.R., Luxon, B., and Kimmel, M. (2004). Mathematical model of NF- $\kappa$ B regulatory module. *J. Theor. Biol.* 228, 195–215.
- Love, J.C., Ronan, J.L., Grotenbreg, G.M., van der Veen, A.G., and Ploegh, H.L. (2006). A microengraving method for rapid selection of single cells producing antigen-specific antibodies. *Nat. Biotechnol.* 24, 703–707.
- Mehling, M., and Tay, S. (2014). Microfluidic cell culture. *Curr. Opin. Biotechnol.* 25, 95–102.
- Melin, J., and Quake, S.R. (2007). Microfluidic large-scale integration: the evolution of design rules for biological automation. *Annu. Rev. Biophys. Biomol. Struct.* 36, 213–231.
- Nathan, C.F. (1987). Secretory products of macrophages. *J. Clin. Invest.* 79, 319–326.
- Nelson, D.E., Ihekwaba, A.E.C., Elliott, M., Johnson, J.R., Gibney, C.A., Foreman, B.E., Nelson, G., See, V., Horton, C.A., Spiller, D.G., et al. (2004). Oscillations in NF- $\kappa$ B signaling control the dynamics of gene expression. *Science* 306, 704–708.
- Ng, A.H.C., Dean Chamberlain, M., Situ, H., Lee, V., and Wheeler, A.R. (2015). Digital microfluidic immunocytochemistry in single cells. *Nat. Commun.* 6, 7513.
- Parameswaran, N., and Patial, S. (2010). Tumor necrosis factor- $\alpha$  signaling in macrophages. *Crit. Rev. Eukaryot. Gene Expr.* 20, 87–103.
- Patil, S., Fribourg, M., Ge, Y., Batish, M., Tyagi, S., Hayot, F., and Sealfon, S.C. (2015). Single-cell analysis shows that paracrine signaling by first responder cells shapes the interferon- $\beta$  response to viral infection. *Sci. Signal.* 8, ra16.
- Raphael, M.P., Christodoulides, J.A., Delehanty, J.B., Long, J.P., and Byers, J.M. (2013). Quantitative imaging of protein secretions from single cells in real time. *Biophys. J.* 105, 602–608.
- Schroder, K., Sweet, M.J., and Hume, D.A. (2006). Signal integration between IFN $\gamma$  and TLR signalling pathways in macrophages. *Immunobiology* 211, 511–524.
- Shirasaki, Y., Yamagishi, M., Suzuki, N., Izawa, K., Nakahara, A., Mizuno, J., Shoji, S., Heike, T., Harada, Y., Nishikomori, R., and Ohara, O. (2014). Real-time single-cell imaging of protein secretion. *Sci. Rep.* 4, 4736.
- Spencer, S.L., Gaudet, S., Albeck, J.G., Burke, J.M., and Sorger, P.K. (2009). Non-genetic origins of cell-to-cell variability in TRAIL-induced apoptosis. *Nature* 459, 428–432.
- Sung, M.-H., Li, N., Lao, Q., Gottschalk, R.A., Hager, G.L., and Fraser, I.D. (2014). Switching of the relative dominance between feedback mechanisms in lipopolysaccharide-induced NF- $\kappa$ B signaling. *Sci. Signal.* 7, ra6.
- Tay, S., Hughey, J.J., Lee, T.K., Lipniacki, T., Quake, S.R., and Covert, M.W. (2010). Single-cell NF- $\kappa$ B dynamics reveal digital activation and analogue information processing. *Nature* 466, 267–271.
- Tomida, T., Oda, S., Takekawa, M., Iino, Y., and Saito, H. (2012). The temporal pattern of stimulation determines the extent and duration of MAPK activation in a *Caenorhabditis elegans* sensory neuron. *Sci. Signal.* 5, ra76.
- Unger, M.A., Chou, H.-P., Thorsen, T., Scherer, A., and Quake, S.R. (2000). Monolithic microfabricated valves and pumps by multilayer soft lithography. *Science* 288, 113–116.
- Vedel, S., Tay, S., Johnston, D.M., Bruus, H., and Quake, S.R. (2013). Migration of cells in a social context. *Proc. Natl. Acad. Sci. USA* 110, 129–134.
- Wall, E.A., Zavzavadjian, J.R., Chang, M.S., Randhawa, B., Zhu, X., Hsueh, R.C., Liu, J., Driver, A., Bao, X.R., Sternweis, P.C., et al. (2009). Suppression of LPS-induced TNF- $\alpha$  production in macrophages by cAMP is mediated by PKA-AKAP95-p105. *Sci. Signal.* 2, ra28.
- Werner, S.L., Barken, D., and Hoffmann, A. (2005). Stimulus specificity of gene expression programs determined by temporal control of IKK activity. *Science* 309, 1857–1861.
- Wu, M., Perroud, T.D., Srivastava, N., Branda, C.S., Sale, K.L., Carson, B.D., Patel, K.D., Branda, S.S., and Singh, A.K. (2012). Microfluidically-unified cell culture, sample preparation, imaging and flow cytometry for measurement of cell signaling pathways with single cell resolution. *Lab Chip* 12, 2823–2831.
- Zhang, X., and Mosser, D.M. (2008). Macrophage activation by endogenous danger signals. *J. Pathol.* 214, 161–178.

**Cell Reports, Volume 15**

**Supplemental Information**

**High-Content Quantification  
of Single-Cell Immune Dynamics**

**Michael Junkin, Alicia J. Kaestli, Zhang Cheng, Christian Jordi, Cem Albayrak, Alexander Hoffmann, and Savaş Tay**

## SUPPLEMENTAL FIGURES

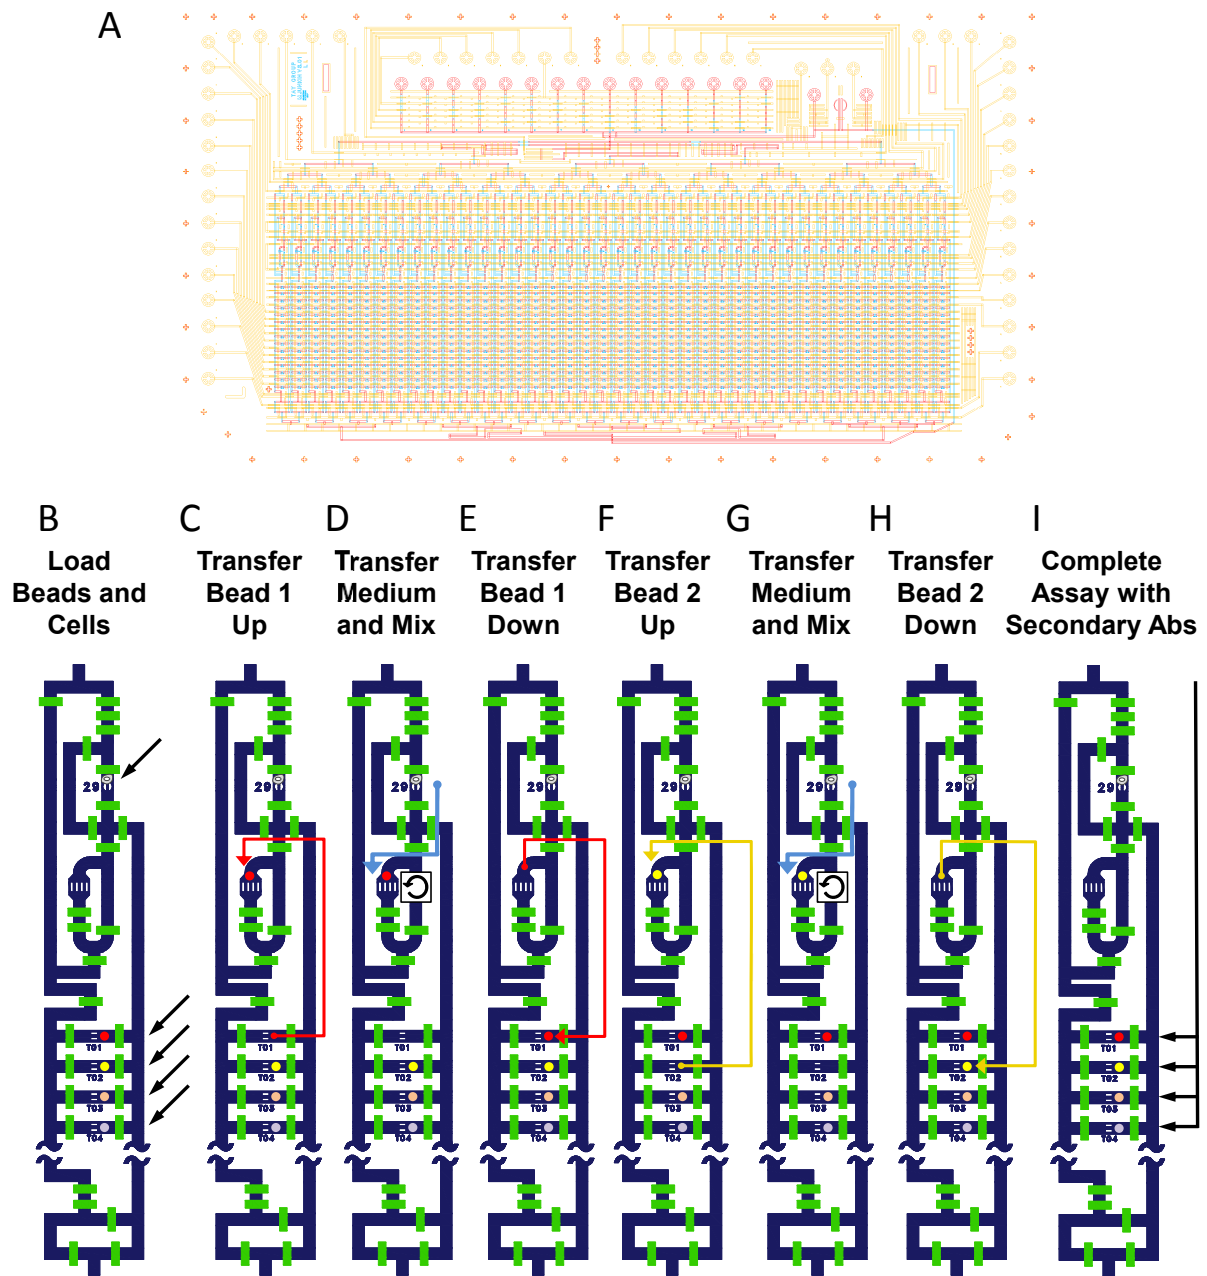

**Figure S1.** Design of microfluidic chip. Related to Figures 1 and 2. (A) CAD file of the overall device layout. Yellow indicates control layer, red and blue indicate the cell culture and assay layer. Functional units are arranged in isolated columns. See (Figure 1) and text for details of individual components. (B-I) Diagram of assay operation. (B) Cells and beads are directed into desired chambers by valves and retained by traps or weirs. (C) On-chip peristaltic pumps are used to transfer beads from Bead Storage Chambers to Binding Chambers. (D) Medium is

transferred from Cell Chambers to Binding Chambers and mixed with another on-chip peristaltic pump to bind secreted molecules to antibody functionalized beads. (E) After sufficient mixing time for binding, beads are transferred back to Bead Storage Chambers with flow. During this transfer, the bead is also rinsed. (F-H) The cycle repeats for following time point measurements with the next beads from subsequent Bead Storage Chambers. (I) After all medium measurements are finished, beads are exposed to secondary antibodies to complete the sandwich immune assay and imaged. The chip is comprised of 40 such columns operating in parallel, however each of the 40 columns is individually addressable with an inlet binary tree multiplexer (not shown).



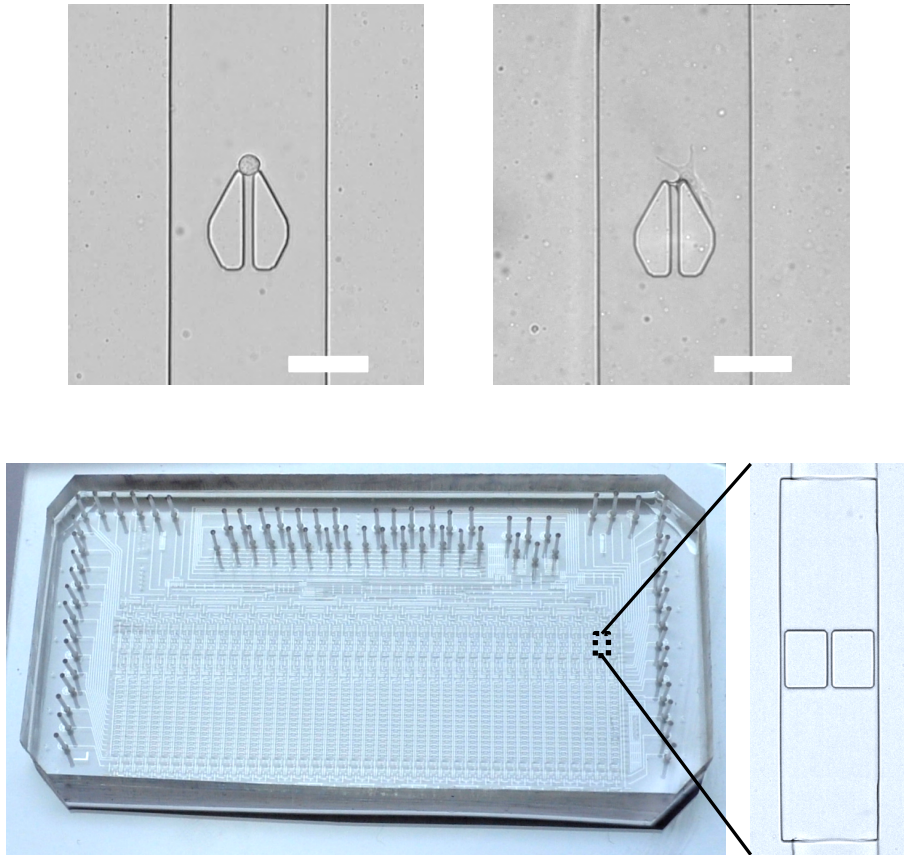

**Figure S2.** Cell trapping and retention. Related to Section: Capture and culture of isolated single-cells and Figure 1. (Top Left) A cell immediately after being retained by the fluidic trap for adherent cells. Fluid flow holds the cell against the trap structure while excess cells pass through the trap area, see also (**Supplemental Video 1**). (Top Right) Cells attached shortly (~5 minutes) after being retained by fluidic traps. Once attached, cells can be washed, supplied medium and stimulated while remaining inside individual chambers. Scale bar is 50  $\mu\text{m}$ . (Bottom) Chip design for non-adherent and rare cell populations. Overall chip architecture is similar to that for non-adherent cells except for trap design shown at right which captures all objects introduced into cell chamber. Traps are placed inside chambers which can be opened and closed via valves so that the cellular environment can be isolated and sampled for measurement at defined times.

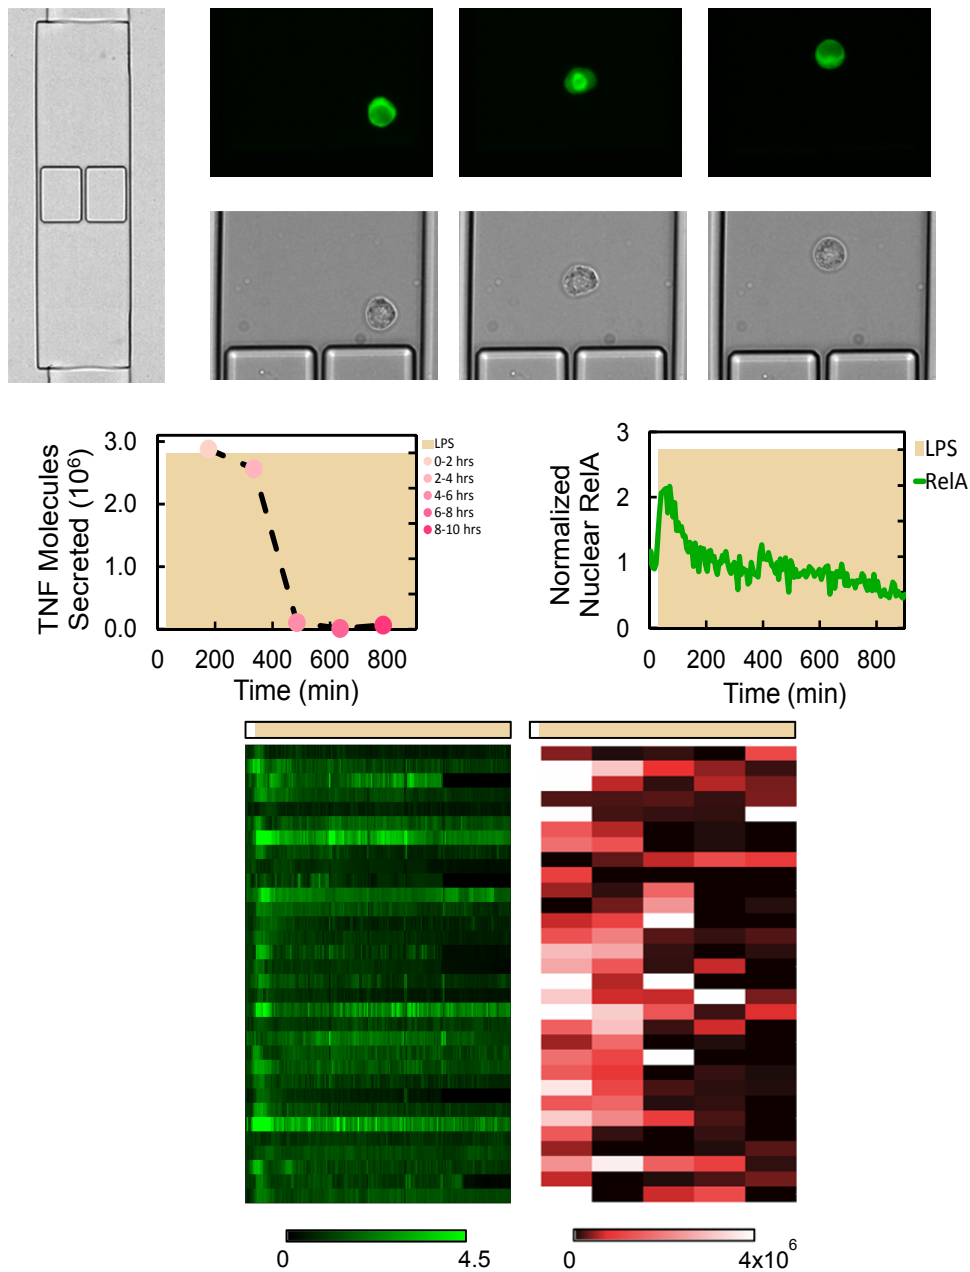

**Figure S3.** Measurement of suspension cells. Related to Section: Capture and culture of isolated single-cells and Figures 1 and 4. Weir type trap design (top left) was used to isolate RAW macrophages inside channels functionalized to be non-adherent. Image sequence shows RelA activity and brightfield monitoring for same cells. Middle panels display measurement of TNF and RelA traces for a single cell stimulated with LPS (500 ng ml<sup>-1</sup>). Lower heatmaps display 10 hours of RelA (left) and TNF (right) data from a population of single macrophages measured in suspension on chip.

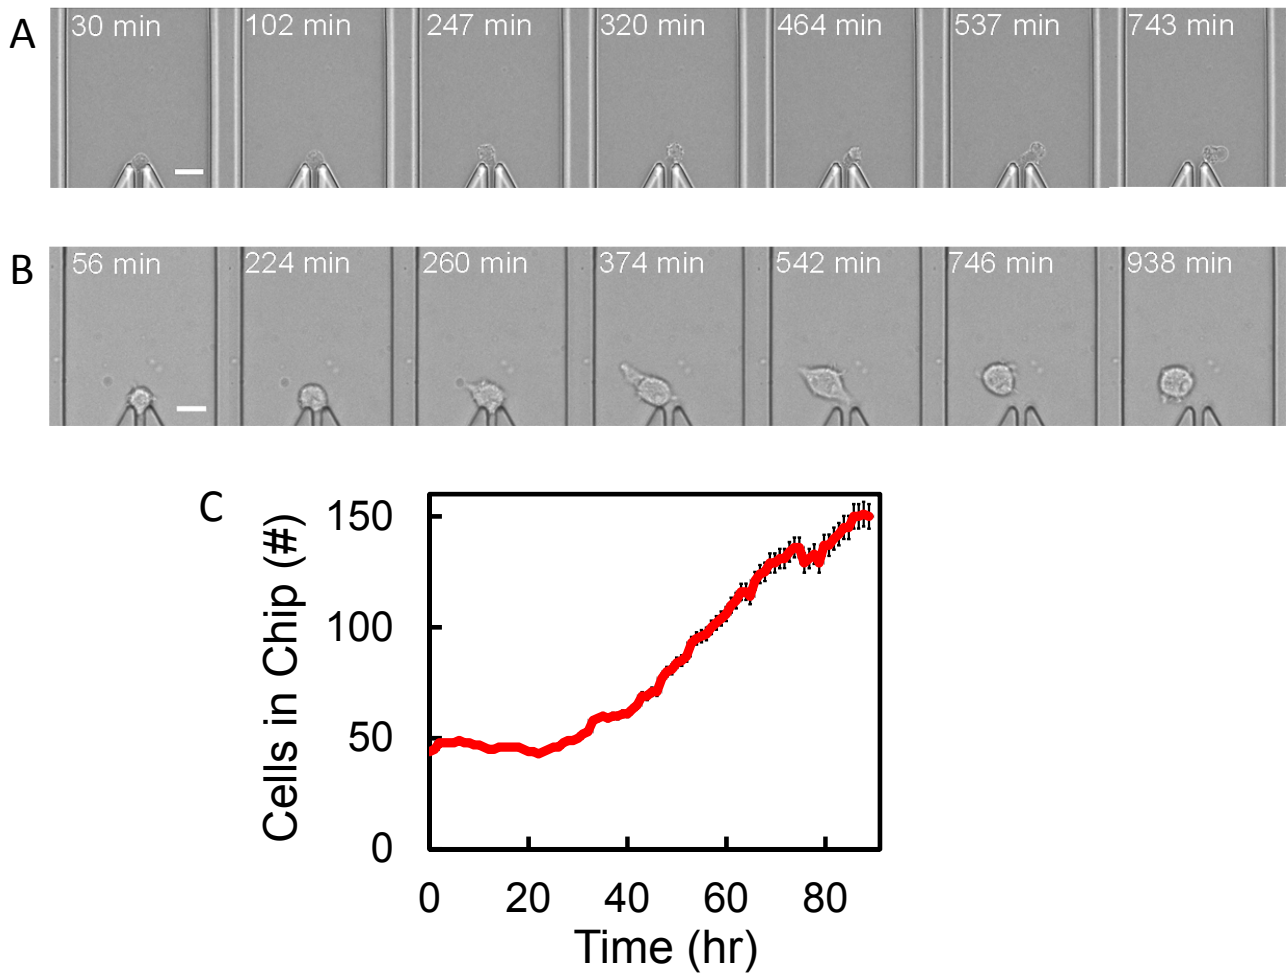

**Figure S4.** Critical parameters for single-cell culture. Related to Section: Capture and culture of isolated single-cells and Figures 1 and 4. (A) Culture of single cells without sufficient humidity control or rinsing of Pluronic. Incorrect culture parameters results in poor attachment, unhealthy cells and early cell death. (B) Culture of single cells under optimized conditions. Cells rapidly attach and can be maintained for several days of experimentation. Times indicate minutes since seeding. Scale bars are 20  $\mu\text{m}$ . (C) Representative measure of on-chip cell viability. RAW 264.7 macrophages were seeded into cell chambers and supplied with fresh medium every two hours. Line indicates total number of cells inside the microfluidic device. Error bars show standard deviation of cell number per chamber

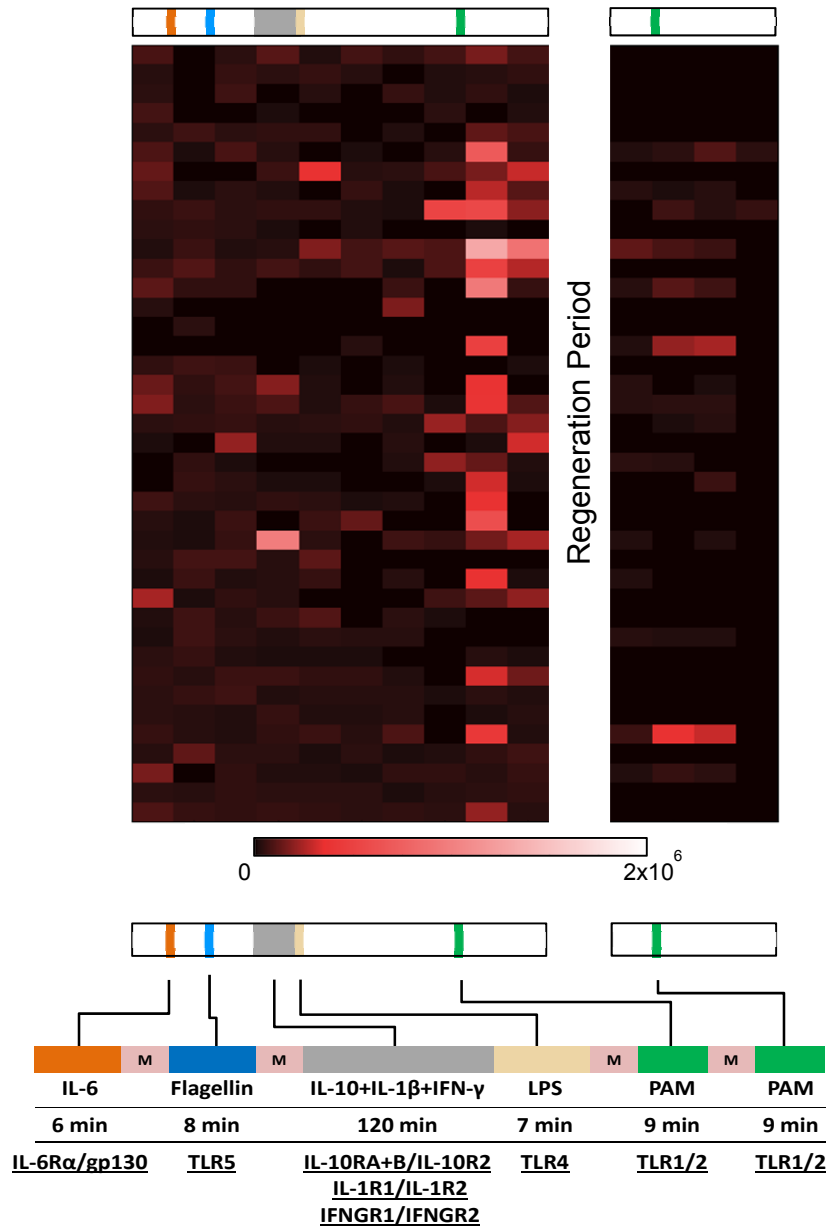

**Figure S5.** Supply of complex, dynamic immune inputs. Related to Section: Automated generation of dynamic and complex signaling inputs and Figure 4. Heatmap shows TNF secretion data for cells stimulated with a range of immune inputs. Lower diagram depicts ligands supplied along with their time courses and corresponding receptors for each ligand.

| <b>System Parameter</b>                                                  | <b>Capability</b>          |
|--------------------------------------------------------------------------|----------------------------|
| <b>STIMULATION</b>                                                       |                            |
| Resolution                                                               | Seconds - hours            |
| Number of inputs or doses                                                | 15                         |
| Control                                                                  | Fully automatic            |
| <b>MEASUREMENT</b>                                                       |                            |
| Resolution<br><i>(Secretion)</i>                                         | Minutes – hours            |
| Multiplexing<br><i>(# of Cytokines / molecules)</i>                      | ~10                        |
| Total number of measurements<br><i>(Secretion)</i>                       | >15 x Number of cytokines* |
| Resolution<br><i>(Imaging of fusion proteins, migration, morphology)</i> | Minutes                    |
| Total number of measurements<br><i>(Imaging)</i>                         | 6 channels                 |
| Control                                                                  | Fully automatic            |
| <b>CELL CULTURE</b>                                                      |                            |
| Number of single cells                                                   | 40                         |
| Culture duration                                                         | Days - Week                |
| Control                                                                  | Fully automatic            |

\* Chip can be reloaded with additional beads during experiments

**Figure S6.** Stimulation, measurement, and culture capabilities of the microfluidic system enabled by the combination of the chip design and system automation. Related to Section: Automated live cell culture and microscopy and Figures 3 and 4.

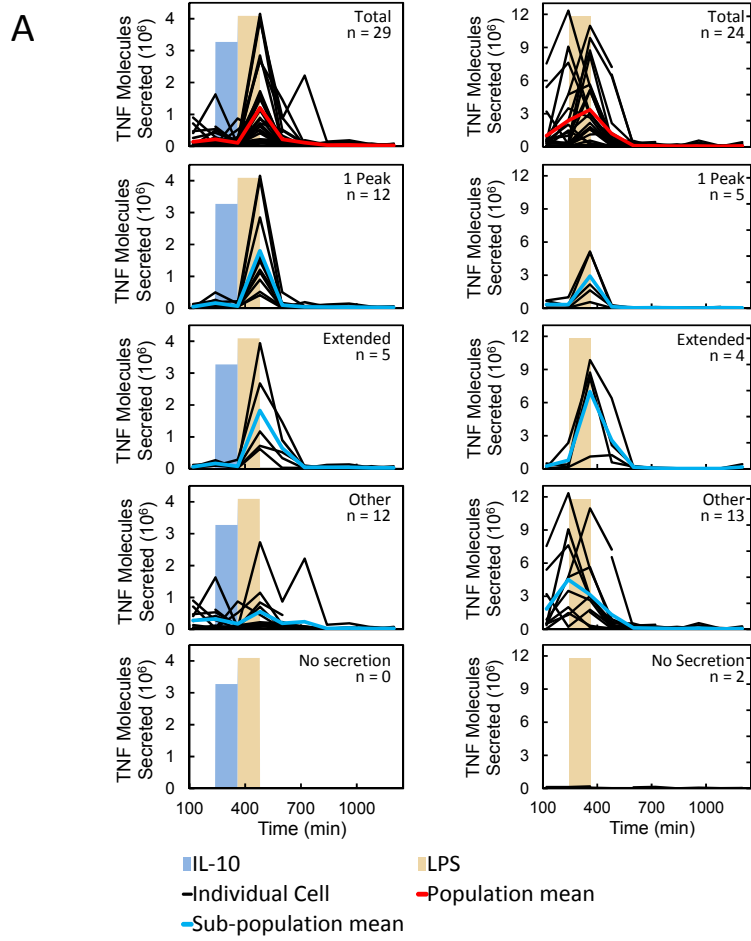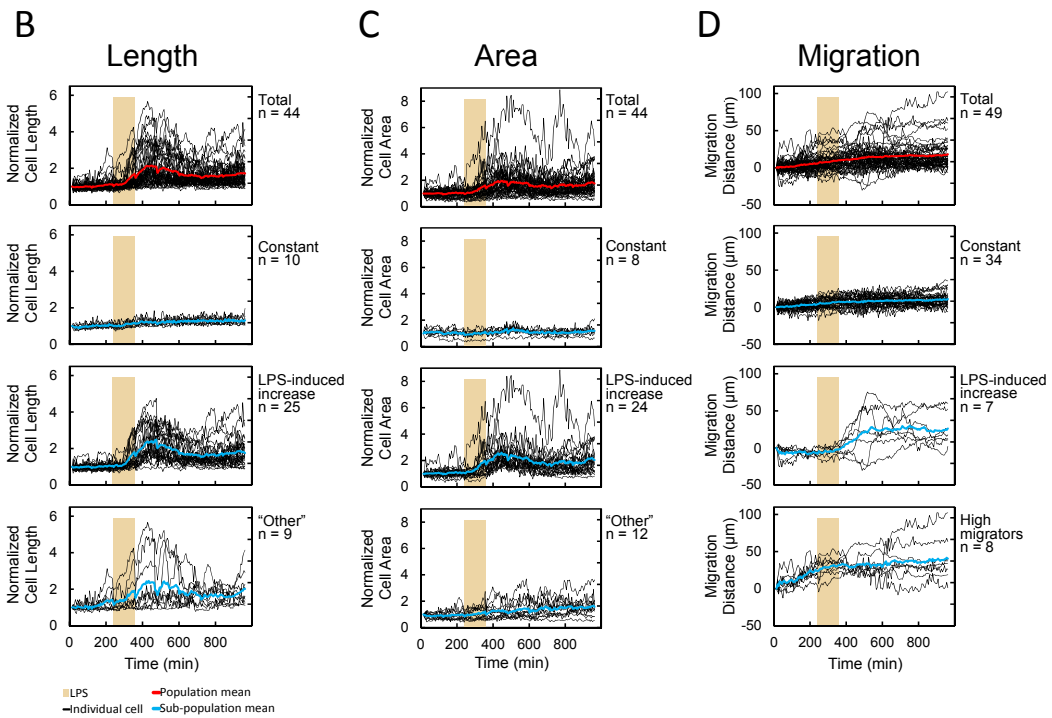

**Figure S7.** Additional macrophage measurements. Related to Figure 5. (A) Heterogeneity in single-cell immune TNF dynamics in response to two hours of IL-10 ( $20 \text{ ng ml}^{-1}$ ) (blue) followed by two hours of LPS ( $500 \text{ ng ml}^{-1}$ ) (tan), or two hours of LPS. The graphs depict whole population and subpopulation responses from top to bottom respectively. (B-D) Migration and morphological data for two hour high dose LPS stimulation from cells from a single chip. Related to Section: Multiparameter analysis of single immune cells reveals poorly correlated NF- $\kappa$ B and TNF secretion dynamics. (B) Length, (C) Cell area. (D) Migration. Each behavior possesses subpopulations with distinct phenotypes. The subpopulation do not correlate to each other with the exception of length and area.

## **SUPPLEMENTAL VIDEOS**

Video 1: Cell Capture, Related to Figure 1

Video 2: Rapid Stimulation, Related to Figure 4

Video 3: Bead Transferring, Related to Figure 1

Video 4: Medium Transfer, Related to Figure 1, Related to Figure 1

Video 5: Rapid Mixing Inside Assay Chambers, Related to Figure 2

Video 6: Mixing During Binding to Bead Surface, Related to Figure 2

Video 7: Fluid Movement Across a Retained Non-adherent Cell, Related to Figure 1



## **SUPPLEMENTAL EXPERIMENTAL PROCEDURES**

### **Fabrication of master molds for PDMS casting**

Molds for microfluidic flow layers for chips were created by spinning AZ50XT (AZ Electronic Materials) resist onto silicon wafers to a height of 23  $\mu\text{m}$ . This resist was then patterned with a polyester film mask from (International Phototool Company, Colorado Springs, CO USA) before being heated to reflow or round its profile. SU8-3025 (MicroChem) was then spun onto the wafers to a height of 25  $\mu\text{m}$  and patterned by a chrome mask obtained from (Delta Mask, Enschede, The Netherlands) using an I-line filter. SU8-3025 was also patterned to a height of 25  $\mu\text{m}$  for control molds using a polyester film mask. Molds were then hardbaked and coated with TMCS (Sigma-Aldrich, 448931) under a fume hood to prevent PDMS sticking to the molds. Detailed protocols are available upon request.

PDMS for microfluidic chips (RTV615, Momentive Performance Materials) was used at a 10:1 ratio. The PDMS was cast to a height of 6 mm for flow layers and spun at 2600 RPM for control layers with a spincoater (Spin150, SPS-Europe, Putten, The Netherlands). Holes for supply and control inputs were punched with a 0.89 mm diameter punch (SYNEO, Schmidt Catheter punch). Flow layers were cleaned with tape (3M Scot Magic<sup>TM</sup>) before being oxygen plasma activated at 20 Watts for 15 seconds in a plasma machine (Diener, Femto, Ebhausen Germany). The two layers were then aligned with a stereo microscope (Nikon SMZ 1500) equipped with two X-Y stages, and immediately placed in an 80°C oven. Chips were kept in the oven for 7 days prior to autoclaving at 121°C for 30 minutes. Post autoclaving, chips were dried at 80°C for 2 hours before use as described above. Detailed protocols are available upon request.

### **Off-chip cell culture**

Macrophages (RAW 264.7) were maintained off chip in non-tissue culture treated T75 flasks (Greiner Bio-One, 658195), and were passaged every three days using versene (Life Technologies, 15040-033). Medium for macrophages consisted of DMEM, (Sigma Aldrich, D6429) with 10 % FBS (Sigma Aldrich, F9665), 1% GlutaMax (Life Technologies, 35050-038), and 2% HEPES (Life Technologies, 15630-056). Jurkat cells were maintained off chip in non-tissue culture treated T75 flasks (Greiner Bio-One, 658195), and were passaged every three days. Medium for Jurkats consisted of RPMI, (Life Technologies, 52400-025) with 10 % heat inactivated FBS (Sigma Aldrich, F9665), 1% GlutaMax (Life Technologies, A12860-01), 1% non essential amino acids (Life Technologies, 11140-035), and 0.2% Penicillin-Streptomycin (Life Technologies 15140-122). 3T3 cells were maintained off chip in tissue culture treated T75 flasks (Greiner Bio-One, 658175), and were passaged every three days. Medium for 3T3 cells consisted of DMEM, (Life Technologies, 41965-062) with 10 % FBS (Sigma Aldrich, F9665), 1% GlutaMax (Life Technologies, 35050-038), and 1% Penicillin-Streptomycin (Life Technologies 15140-122). KL25 cells were maintained off chip in Nunclon Delta-treated T25 flasks (Thermo Scientific, 156367), and were passaged every two to three days. Medium for KL25 cells was made of DMEM (Life Technologies, 11960-044), 10% FBS (Sigma Aldrich, F9665), 10 mM Hepes (Life Technologies, 15630-056), 0.2% Penicillin-Streptomycin (Life

Technologies 15140-122), 2 mM L-Glutamine (Life Technologies, 25030-032), and 50  $\mu$ M 2-Mercaptoethanol (Sigma Aldrich, M3148). Normal medium for each cell type was used for on-chip culture and experiments. Macrophages (Wall et al., 2009) were obtained from the Ian Fraser Lab, NIH USA, Jurkat cells were obtained from the Christoph Hess, University of Basel, Switzerland. 3T3 cells (Lee et al., 2009) were obtained from the Quake Lab, Stanford University, USA, and KL-25 (Bruns et al., 1983) cells were obtained from the Reddy Lab, ETH Zürich.

### **Assay components for on chip cellular staining**

Components for on-chip cell staining included BD Cytotfix/Cytoperm, (BD Biosciences 554722) for cell fixation and permeabilization, and ActinRed 555 ReadyProbes reagent (Life Technologies R37112) for actin labeling. Cells were stained by flowing the fixing and permeabilization solution over cells for five minutes, followed by ten minutes of flow of the actin staining solution diluted to one drop  $\text{ml}^{-1}$  of medium, and finally ten minutes of flow with PBS before imaging. All steps were undertaken under standard cell culture conditions (37°C, saturating humidity and a 5%  $\text{CO}_2$  atmosphere).

### **Statistical analysis of data**

Statistical analysis of the data presented is as follows. For calibration curves, the sample size was selected to ensure adjacent calibration values could be distinguished reliably given noise levels (i.e.  $P \leq 0.01$  using a two-tailed, unequal variance t-test). For data shown in Figure 4B, Figure S3, and Figure S6 heatmaps include all measurements gathered from chip experiments including when multiple cells were present inside a chamber. Numbers are 40 chambers for single two hour pulse, repeated pulses of LPS and multiparameter stimulation, and 24 chambers for constant LPS exposure. Only single cell time courses were used for subsequent comparisons with the exception of modeling where averages of RelA profiles and summed TNF released from multiple cells in a single chamber were considered. For analysis of mRNA transcript number, outliers were classified using a local outlier factor (LOF) which calculates the densities of measurements around each data point (Breunig et al., 2000). With this classification, outliers or sub-clusters differ from the bulk data in their local measurement density. Using a five nearest neighbors approach to calculate the LOF we classified two *CD147* measurements (90.6, 111) as outliers and for *Gapdh*, we identified five measurements that formed a sub-cluster separated from the other data points (34.8, 428, 478, 536 and 1204) which were subsequently removed from further analysis. The remaining data were fit to gamma distributions and the Kolmogorov-Smirnov (KS) and the more powerful Anderson-Darling (AD) tests were used as goodness of fit measures (Stephens, 1974). The generated p-Values (KS: 0.92, AD: 0.85 for *CD147*, and KS: 0.83, AD: 0.85 for *Gapdh*) revealed no significant difference between the distributions of measured mRNA values and the fitted gamma distribution.

### **Mathematical modeling of dynamic RelA and TNF**

Previous TLR4-TNF modeling efforts have been used to study bulk-measurement-based TNF production under different knockout conditions (e.g. wild-type, TRIF<sup>-/-</sup> and MYD88<sup>-/-</sup>) and thus were developed as deterministic

models without consideration of cell-to-cell variability (Caldwell et al., 2014), rendering them incapable for studying single-cell behavior. Subsequent to this, the extrinsic noise related to TLR4 signaling has been characterized, and it has been determined that by introducing log-normally distributed TLR4 generation, MyD88 and TRIF activation, together with an experimentally measured Gaussian distribution of the endosome maturation time, the TLR4 model can explain single-cell reactions for different doses of LPS stimulation (Cheng et al., 2015). These details have been incorporated in the current study, updating the TLR4 model from (Cheng et al., 2015) to be able to simulate single-cell behavior.

Another modification relates to the fact that the original model takes NF- $\kappa$ B as an input, constituting of genotype-dependent (mainly TRIF-dependent) rates of transcription, mRNA processing, mRNA degradation, translation and secretion (Caldwell et al., 2014). Here, however, the TRIF-regulation was changed from a genotype-dependent multiplier into a regulation function, to better reflect actual regulation. Specifically, there are four places of TRIF regulation: A function of stimulus-responsive control of processing ( $k_{pr}$ ), half-life control (degradation rate  $k_{degm}$ ), translation ( $k_{tl}$ ), pro-protein processing and secretion ( $k_{sec}$ ), included in the model as shown below:

$$k_{pr} = k_{pr0} * f_a (TRIF(t))$$

$$k_{degm} = k_{degm0} * f_i (TRIF(t))$$

$$k_{tl} = k_{tl0} * f_a (TRIF(t))$$

$$k_{sec} = k_{sec0} * f_a (TRIF(t))$$

with regulation as the following:

$$f_a (TRIF(t)) = \frac{TRIF(t) + K_{a0}}{TRIF(t) + K_a}$$

$$f_i (TRIF(t)) = \frac{K_i}{TRIF(t) + K_i}$$

Please see original manuscripts for further code details (Cheng et al., 2015, Caldwell et al., 2014).

## **Random walk model for protein diffusion and capture**

A 2D random walk model was implemented in MATLAB to simulate capture of cytokines on beads inside a microchannel environment. The model was formulated as follows. A chamber was defined as a rectangular shape having similar dimensions to the actual microfluidic device. Particles having no dimension and no interactions with each other representing cytokines were then randomly distributed within the chamber and a region the size of an antibody functionalized bead, representing the capture, surface was established within the box. In the case of diffusive transfer, during each one second time step of the simulation, particles were given a randomly oriented displacement and moved a fixed distance on this trajectory. The distance traveled was calculated from the diffusion constant of the given cytokine. In the case of mixing, particles locations were randomized at each time step to mimic

the high convective transfer provided by on chip peristaltic mixing. If a particle travelled outside of the defined chamber, it was considered as reflected off the chamber wall and resumed its previous position. If a particle entered the capture area, it was treated as bound to the bead and removed from further diffusive movement. The output of movements and capture were then displayed graphically, Figure 2D, and the number of captured cytokines was plotted at certain times. The effects of various parameters upon capture were explored including the presence and absence of mixing, altered channel dimensions, and different diffusion coefficients corresponding to different cytokines. Code is available upon request.

### **Multiplexed on-chip measurements of single-cell secreted cytokines**

Multicomponent outputs are part of any immune response and their functions can be explored by examining release of multiple cytokines via utilizing the multiplexing capability of the system. To this end, detection of secreted cytokines from macrophage medium for TNF, IL-6, IL-10, IL-12, IFN- $\gamma$ , and MCP-1 has been performed. These beads (except for TNF) originated from kits (see above) encoding cytokine identity via tagging for a particular antibody with an internal dye, and allow simultaneous detection of a highly flexible number of components in one sample (Figure 3A). As with the previous experiments, the secretion data was coupled with the known input dynamics, which for this scenario consisted of continuous LPS exposure ( $500 \text{ ng ml}^{-1}$ ), as well as the internal NF- $\kappa$ B reaction, and migration and morphology data.

### **Effect of complex, dynamic input history on TNF secretion from single cells**

Complex, multidimensional signal histories exist during the course of an immune reaction, though what their effects may be upon immune cell functions and even their specific compositions remain largely unexplored. As an initial exploration of this aspect of immunity, additional immune scenarios were tested via the device to probe various temporal, signal history, and multiparameter effects upon immune input-output relationships. We provided cells an input history over more than two days consisting of typical pro- and anti-inflammatory stimuli at different time scales, ranging from cytokines to various pathogen-based ligands. TNF secretion dynamics, NF- $\kappa$ B and migration and morphology were again measured. The stimuli duration ranged from as short as seven minutes, to longer inputs of two hours, (Figure S6). IL-6 with known anti-inflammatory properties (Starkie et al., 2003) was first briefly supplied followed by short exposure to flagellin, then a mixture of the cytokines IL-10, IL-1 $\beta$ , IFN- $\gamma$  for two hours before an immediate short exposure to a low dose of LPS. Cells were then supplied with medium for eight hours before being exposed to a brief pulse of bacterial Pam3CSK4. They were then allowed to recover for 34 hours, before the chip was reloaded with additional beads and an identical pulse of Pam3CSK4 was again given, simulating re-exposure to the pathogen. During this long-term complex input delivery, the cells were measured in all three modes (TNF secretion, NF- $\kappa$ B and migration). These measurements demonstrate firstly the comprehensive ability to supply long-term inputs at rapid and varying timescales as well as the dependence of the cellular history on its ultimate response. We observed that the stimulations prior to administration of LPS rendered cells refractive to this stimulant, in terms of both NF- $\kappa$ B activation and TNF release as they would normally respond to the supplied dose, (Figure S6). This single experiment generated an extensive multiparameter, data set and demonstrated several days of automated culture and experimentation with a complex input history. Though the shortest pulse of stimulant

given was seven minutes, inputs as short as several seconds can also be applied to cells, as time-pulses are limited only by valve openings which take place in the sub-second range, (Supplemental Video 2).

### **End point measurements of single-cells: on-chip immunostaining, harvesting for clonal expansion, and gene expression**

Single cells have been stained on the chip for key proteins via automatic delivery of staining components (see above), (Figure 3B), and been harvested via flowing out of the chip into individual wells of a 96 well plate. Single-cell harvesting allows for either expansion of these cells, (Figure 3C), which enables a number of uses such as enriching for certain populations, or allows for directly analyzing gene expression of single-cells. We have retrieved single cells from the chip and measured absolute mRNA transcript numbers via droplet digital PCR (see Experimental Procedures) for several genes (both lowly and highly expressed) in different cell types as a proof of this concept, (Figure 3D). Measuring cells retrieved from the chip, we found that both *Gapdh* and *CD147* mRNA copy numbers in single mouse macrophages are highly variable. The measured single-cell mRNA distributions are super-Poisson, and fit well to a gamma distribution, (see below), supporting a stochastic two-state (random telegraph) model for gene expression in these cells. From the measured gamma distributions, a burst size per gene activation of  $25 \pm 9$  for *CD147*, and  $313 \pm 92$  mRNAs for *Gapdh* were calculated, and bursting frequencies of  $0.69 \pm 0.19$  per day for *CD147*, and  $19.1 \pm 5.5$  per day for *Gapdh* were derived based on published values of mRNA half-lives (Schwanhäusser et al., 2011, Kuwano et al., 2009).

### **Analysis of single-cell mRNA measurements**

The measured mRNA copy numbers were fit to several possible probability density functions (pdf's) to determine their most likely distribution. As the variance of the observed data is much higher than their mean, the poisson pdf is not a good fit ( $p \ll 0.05$   $\chi^2$ -test). The gamma pdf, conversely, satisfactorily reproduces both the *CD147* and *Gapdh* mRNA copy number distributions. These findings agree with a two state model of gene expression, where a gene can switch between phases of transcription and inactivity (Paulsson, 2005, Peccoud and Ycart, 1995, Raj and van Oudenaarden, 2008). These oscillations lead to an increased copy number variance compared to a case of constant mRNA production and degradation. Furthermore, it has been shown previously, that the shape and rate parameters of the fitted gamma distribution are indicators of the bursting rate of a gene (how often the gene is actively transcribed) and its burst size (how many transcripts are on average produced per period of activity) (Raj et al., 2006, Cai et al., 2006, Schwanhäusser et al., 2011, Kuwano et al., 2009).

## Supplemental References

- Breunig, M. M., Kriegel, H.-P., Ng, R. T. & Sander, J. 2000. LOF: identifying density-based local outliers. *SIGMOD Rec.*, 29, 93-104.
- Bruns, M., Cihak, J., Müller, G. & Lehmann-Grube, F. 1983. Lymphocytic choriomeningitis virus. VI. Isolation of a glycoprotein mediating neutralization. *Virology*, 130, 247-251.
- Cai, L., Friedman, N. & Xie, X. S. 2006. Stochastic protein expression in individual cells at the single molecule level. *Nature*, 440, 358-362.
- Caldwell, A. B., Cheng, Z., Vargas, J. D., Birnbaum, H. A. & Hoffmann, A. 2014. Network dynamics determine the autocrine and paracrine signaling functions of TNF. *Genes & Development*, 28, 2120-2133.
- Cheng, Z., Taylor, B., Ourthiague, D. R. & Hoffmann, A. 2015. Distinct single-cell signaling characteristics are conferred by the MyD88 and TRIF pathways during TLR4 activation. *Sci. Signal.*, 8, ra69-ra69.
- Kuwano, Y., Rabinovic, A., Srikantan, S., Gorospe, M. & Demple, B. 2009. Analysis of Nitric Oxide-Stabilized mRNAs in Human Fibroblasts Reveals HuR-Dependent Heme Oxygenase 1 Upregulation. *Molecular and Cellular Biology*, 29, 2622-2635.
- Lee, T. K., Denny, E. M., Sanghvi, J. C., Gaston, J. E., Maynard, N. D., Hughey, J. J. & Covert, M. W. 2009. A Noisy Paracrine Signal Determines the Cellular NF- $\kappa$ B Response to Lipopolysaccharide. *Sci. Signal.*, 2, ra65-.
- Paulsson, J. 2005. Models of stochastic gene expression. *Physics of Life Reviews*, 2, 157-175.
- Peccoud, J. & Ycart, B. 1995. Markovian Modeling of Gene-Product Synthesis. *Theoretical Population Biology*, 48, 222-234.
- Raj, A., Peskin, C. S., Tranchina, D., Vargas, D. Y. & Tyagi, S. 2006. Stochastic mRNA Synthesis in Mammalian Cells. *PLoS Biol*, 4, e309.
- Raj, A. & van Oudenaarden, A. 2008. Nature, Nurture, or Chance: Stochastic Gene Expression and Its Consequences. *Cell*, 135, 216-226.
- Schwanhäusser, B., Busse, D., Li, N., Dittmar, G., Schuchhardt, J., Wolf, J., Chen, W. & Selbach, M. 2011. Global quantification of mammalian gene expression control. *Nature*, 473, 337-342.
- Starkie, R., Ostrowski, S. R., Jauffred, S., Febbraio, M. & Pedersen, B. K. 2003. Exercise and IL-6 infusion inhibit endotoxin-induced TNF- $\alpha$  production in humans. *The FASEB Journal*, 17, 884-886.
- Stephens, M. A. 1974. EDF Statistics for Goodness of Fit and Some Comparisons. *Journal of the American Statistical Association*, 69, 730-737.
- Wall, E. A., Zavzavadjian, J. R., Chang, M. S., Randhawa, B., Zhu, X., Hsueh, R. C., Liu, J., Driver, A., Bao, X. R., Sternweis, P. C., Simon, M. I. & Fraser, I. D. C. 2009. Suppression of LPS-Induced TNF- $\alpha$  Production in Macrophages by cAMP Is Mediated by PKA-AKAP95-p105. *Sci. Signal.*, 2, ra28-.
